# Supplementary material for: Global, Regional, and National Burden of Ovarian Cancer in Women Aged 45+ from 1990 to 2021 and Projections for 2050: A Systematic Analysis Based on the 2021 Global Burden of Disease Study
Source: Research Square preprint supplement (doi:10.21203/rs.3.rs-6873532/v1), 2025-06-16
Supplement: Supplementary file 1 [file 1701d068f6cee7ea1bd79005.xlsx]

## Sheet: Sheet1
	location_name	Overall_Difference	Aging	Population	Epidemiological_Change	Aging_Percentage	Population_Percentage	Epidemiological_Change_Percentage
ASIR	Southeast Asia	17510.9	2603.33	9522.14	5385.4	14.87	54.38	30.75
ASIR	Global	115181	2149.77	135886	-22854.2	1.87	117.98	-19.84
ASIR	East Asia	22538.5	4440.21	17778.2	320.07	19.7	78.88	1.42
ASIR	Oceania	86.14	14.07	49.23	22.84	16.33	57.15	26.52
ASIR	Central Europe	3382.16	-4333.55	6861.48	854.24	-128.13	202.87	25.26
ASIR	Central Asia	1404.59	-315.93	1154.28	566.24	-22.49	82.18	40.31
ASIR	Eastern Europe	2205.33	-9998.1	12024.8	178.59	-453.36	545.26	8.1
ASIR	Western Europe	922.5	-15037.2	28708.2	-12748.5	-1630.06	3112.01	-1381.96
ASIR	Australasia	104.53	-4.99	1324.78	-1215.26	-4.78	1267.36	-1162.59
ASIR	High-income Asia Pacific	4683.39	-1204.41	5695.55	192.25	-25.72	121.61	4.1
ASIR	High-income North America	4789.09	-4792.36	18541.9	-8960.47	-100.07	387.17	-187.1
ASIR	Caribbean	941.48	-5.61	669.39	277.69	-0.6	71.1	29.5
ASIR	Southern Latin America	1011.87	-384.35	1786.66	-390.45	-37.98	176.57	-38.59
ASIR	Andean Latin America	1292.53	245.98	577.81	468.74	19.03	44.7	36.27
ASIR	Tropical Latin America	4641.35	1168.39	2987.58	485.38	25.17	64.37	10.46
ASIR	Central Latin America	6560.54	1601.79	3151.09	1807.66	24.42	48.03	27.55
ASIR	North Africa and Middle East	6726.99	1278.87	3722.19	1725.92	19.01	55.33	25.66
ASIR	South Asia	27579.9	4576.64	14659.9	8343.42	16.59	53.15	30.25
ASIR	Central Sub-Saharan Africa	863.67	101.05	483.71	278.92	11.7	56.01	32.29
ASIR	Eastern Sub-Saharan Africa	3883.28	349.43	2455.77	1078.08	9	63.24	27.76
ASIR	Southern Sub-Saharan Africa	1539.65	44.54	899.51	595.61	2.89	58.42	38.68
ASIR	Western Sub-Saharan Africa	2512.88	322.44	1346.61	843.83	12.83	53.59	33.58
ASIR	Low SDI	8237.72	614.16	5167.14	2456.42	7.46	62.73	29.82
ASIR	High SDI	13247.1	-15834.6	53156.9	-24075.2	-119.53	401.27	-181.74
ASIR	Middle SDI	43743.2	8013	26251.1	9479.1	18.32	60.01	21.67
ASIR	High-middle SDI	23551.2	-5491.66	35175.2	-6132.33	-23.32	149.36	-26.04
ASIR	Low-middle SDI	26290	2750.96	14624.6	8914.43	10.46	55.63	33.91
ASPR	Southeast Asia	71211.7	8953.37	35159.9	27098.5	12.57	49.37	38.05
ASPR	East Asia	96526.7	13344	62978.5	20204.2	13.82	65.24	20.93
ASPR	Global	427870	-3915.21	465032	-33247	-0.92	108.69	-7.77
ASPR	Oceania	322.47	51.25	171.29	99.93	15.89	53.12	30.99
ASPR	Central Europe	10419.4	-16155.9	22216.9	4358.45	-155.06	213.23	41.83
ASPR	Central Asia	4952.79	-824.75	3768.44	2009.09	-16.65	76.09	40.56
ASPR	Eastern Europe	8248.45	-34818.3	40306.2	2760.56	-422.12	488.65	33.47
ASPR	Western Europe	6580.42	-57821	100468	-36066.8	-878.68	1526.78	-548.09
ASPR	Australasia	369.19	-180.35	4793.77	-4244.24	-48.85	1298.46	-1149.62
ASPR	High-income Asia Pacific	20913.5	-8551.24	22750.1	6714.65	-40.89	108.78	32.11
ASPR	Caribbean	3250.79	-80.43	2152.47	1178.76	-2.47	66.21	36.26
ASPR	Southern Latin America	3908.91	-1480.35	5637.12	-247.85	-37.87	144.21	-6.34
ASPR	High-income North America	16445.9	-16587.9	65567.3	-32533.4	-100.86	398.68	-197.82
ASPR	Central Latin America	23681.5	4897.81	10503.8	8279.95	20.68	44.35	34.96
ASPR	Andean Latin America	4493.62	733.29	1868.14	1892.19	16.32	41.57	42.11
ASPR	Tropical Latin America	15749.4	3142.59	9497.93	3108.92	19.95	60.31	19.74
ASPR	North Africa and Middle East	25299.4	4381.17	12696.1	8222.1	17.32	50.18	32.5
ASPR	Eastern Sub-Saharan Africa	12312.8	1056.54	7140.61	4115.62	8.58	57.99	33.43
ASPR	Central Sub-Saharan Africa	2759.33	302.23	1444.92	1012.18	10.95	52.36	36.68
ASPR	South Asia	88064.5	19267.9	43157.8	25638.8	21.88	49.01	29.11
ASPR	Western Sub-Saharan Africa	7769.7	1169.06	3851.26	2749.38	15.05	49.57	35.39
ASPR	Southern Sub-Saharan Africa	4589.64	560.58	2554.08	1474.98	12.21	55.65	32.14
ASPR	Middle SDI	165701	24643.4	89705.3	51352.1	14.87	54.14	30.99
ASPR	Low SDI	25737.8	1793.45	15057.6	8886.77	6.97	58.5	34.53
ASPR	Low-middle SDI	86570.9	7161.33	45604.7	33804.9	8.27	52.68	39.05
ASPR	High SDI	55426.5	-65572.2	187186	-66187.2	-118.3	337.72	-119.41
ASPR	High-middle SDI	94043.7	-22033.9	122685	-6607.56	-23.43	130.46	-7.03
ASMR	Central Asia	1038.54	-278.47	882.76	434.25	-26.81	85	41.81
ASMR	Global	80101	3713.19	98369.2	-21981.4	4.64	122.81	-27.44
ASMR	High-income Asia Pacific	3211.38	-255.66	3926.72	-459.67	-7.96	122.28	-14.31
ASMR	High-income North America	3847.33	-3525.11	13426.9	-6054.44	-91.62	348.99	-157.37
ASMR	Oceania	46.08	7.64	27.64	10.81	16.57	59.97	23.46
ASMR	North Africa and Middle East	4644.7	921.55	2674.3	1048.85	19.84	57.58	22.58
ASMR	Central Sub-Saharan Africa	626.5	76.46	360.29	189.75	12.2	57.51	30.29
ASMR	Tropical Latin America	3459.67	994.42	2245.75	219.49	28.74	64.91	6.34
ASMR	Southeast Asia	9106.37	1546.55	5255.8	2304.01	16.98	57.72	25.3
ASMR	Australasia	136.29	22.93	1013	-899.64	16.82	743.25	-660.08
ASMR	Andean Latin America	936.37	195.8	430.2	310.37	20.91	45.94	33.15
ASMR	Eastern Europe	1705.29	-7060.19	8720.53	44.95	-414.02	511.38	2.64
ASMR	East Asia	14255.5	3536.86	12456.5	-1737.75	24.81	87.38	-12.19
ASMR	High SDI	10485.2	-10166.9	39561.8	-18909.7	-96.96	377.31	-180.35
ASMR	Low SDI	6067.26	467.87	3895.34	1704.06	7.71	64.2	28.09
ASMR	Central Europe	3115.57	-3063.43	5433.75	745.25	-98.33	174.41	23.92
ASMR	Low-middle SDI	18539.6	2249.26	10439.4	5850.94	12.13	56.31	31.56
ASMR	Western Europe	1764.79	-10526.8	21819.1	-9527.51	-596.49	1236.36	-539.87
ASMR	Central Latin America	4600.4	1251.94	2296.14	1052.32	27.21	49.91	22.87
ASMR	Southern Latin America	726.84	-243.2	1374.45	-404.4	-33.46	189.1	-55.64
ASMR	South Asia	20330.8	3807.81	10868.8	5654.2	18.73	53.46	27.81
ASMR	Southern Sub-Saharan Africa	1168.08	30.05	695.91	442.12	2.57	59.58	37.85
ASMR	High-middle SDI	16616.5	-3428.95	25414.4	-5368.92	-20.64	152.95	-32.31
ASMR	Western Sub-Saharan Africa	1834.35	197.28	1030.64	606.43	10.75	56.19	33.06
ASMR	Middle SDI	28306.4	6010.09	17944.4	4351.94	21.23	63.39	15.37
ASMR	Caribbean	695.36	9.68	503.67	182.01	1.39	72.43	26.17
ASMR	Eastern Sub-Saharan Africa	2850.76	260.28	1860.37	730.11	9.13	65.26	25.61
ASDR	Global	1.97556e+06	7885.31	2.5337e+06	-566019	0.4	128.25	-28.65
ASDR	East Asia	383279	83561.5	356131	-56412.5	21.8	92.92	-14.72
ASDR	High-income North America	64084	-75185.9	305371	-166101	-117.32	476.52	-259.19
ASDR	High-income Asia Pacific	49453.2	-32500.1	98257.4	-16304.1	-65.72	198.69	-32.97
ASDR	Tropical Latin America	88009.5	22118.2	60284.8	5606.62	25.13	68.5	6.37
ASDR	Central Europe	52468.5	-92086.8	137914	6641.7	-175.51	262.85	12.66
ASDR	Central Latin America	128279	31452	63541.4	33285.3	24.52	49.53	25.95
ASDR	South Asia	554865	91459.5	312803	150602	16.48	56.37	27.14
ASDR	Middle SDI	782205	150206	512507	119491	19.2	65.52	15.28
ASDR	Central Asia	30012.7	-6511.02	25304.7	11219	-21.69	84.31	37.38
ASDR	Eastern Europe	22398.2	-198729	235759	-14631.8	-887.25	1052.58	-65.33
ASDR	Southeast Asia	266067	42082.3	156797	67187.6	15.82	58.93	25.25
ASDR	Oceania	1428.42	241.64	849.92	336.85	16.92	59.5	23.58
ASDR	Eastern Sub-Saharan Africa	82239	7505.68	54047.2	20686.1	9.13	65.72	25.15
ASDR	North Africa and Middle East	127411	25425.6	75234.7	26750.8	19.96	59.05	21
ASDR	Caribbean	18059.5	-229.76	13346.9	4942.31	-1.27	73.91	27.37
ASDR	Australasia	-555.27	-398.63	23162.8	-23319.4	71.79	-4171.43	4199.64
ASDR	Southern Latin America	16325.5	-12185.3	34464.5	-5953.61	-74.64	211.11	-36.47
ASDR	Andean Latin America	24906.5	4804.77	11650.1	8451.63	19.29	46.78	33.93
ASDR	Western Sub-Saharan Africa	53752.1	7738.2	29098.1	16915.8	14.4	54.13	31.47
ASDR	Southern Sub-Saharan Africa	31430.8	1015.96	18571	11843.9	3.23	59.09	37.68
ASDR	Low-middle SDI	513635	52727.2	300614	160294	10.27	58.53	31.21
ASDR	Central Sub-Saharan Africa	18731.9	2172.62	10819.9	5739.41	11.6	57.76	30.64
ASDR	High SDI	129246	-286144	905838	-490448	-221.4	700.87	-379.47
ASDR	Western Europe	-37081.4	-260406	481870	-258545	702.26	-1299.49	697.24
ASDR	High-middle SDI	375940	-114064	672608	-182604	-30.34	178.91	-48.57
ASDR	Low SDI	172738	12927.8	113295	46515	7.48	65.59	26.93
