# Supplementary material for: Global, Regional, and National Burden of Ovarian Cancer in Women Aged 45+ from 1990 to 2021 and Projections for 2050: A Systematic Analysis Based on the 2021 Global Burden of Disease Study
Source: Research Square preprint supplement (doi:10.21203/rs.3.rs-6873532/v1), 2025-06-16
Supplement: Supplementary file 2 [file 46d221de6a72290823048c17.xlsx]

## Sheet: Sheet1
ASIR	row.names	APCs	p
ASIR	slope1	0.526(0.373,0.680)	*
ASIR	slope2	-0.365(-0.448,-0.283)	*
ASIR	slope3	-0.963(-1.033,-0.893)	*
ASIR	slope4	-0.212(-0.333,-0.092)	*
ASIR	"AAPC= -0.079(-0.083,-0.075)"
ASPR	row.names	APCs	p
ASPR	slope1	0.717(0.439,0.996)	*
ASPR	slope2	0.130(0.033,0.226)	*
ASPR	slope3	-0.849(-0.931,-0.766)	*
ASPR	slope4	-0.090(-0.299,0.119)
ASPR	"AAPC= -0.110(-0.131,-0.088)"
ASMR	row.names	APCs	p
ASMR	slope1	0.303(0.096,0.509)	*
ASMR	slope2	-0.443(-0.527,-0.360)	*
ASMR	slope3	-1.020(-1.081,-0.958)	*
ASMR	slope4	-0.352(-0.474,-0.229)	*
ASMR	"AAPC= -0.077(-0.080,-0.074)"
ASDR	row.names	APCs	p
ASDR	slope1	0.196(-0.005,0.398)
ASDR	slope2	-0.571(-0.641,-0.501)	*
ASDR	slope3	-1.026(-1.095,-0.957)	*
ASDR	slope4	-0.182(-0.302,-0.062)	*
ASDR	"AAPC= -1.978(-2.059,-1.897)"
*represents a statistical difference.
