# Supplementary material for: Global, Regional, and National Burden of Ovarian Cancer in Women Aged 45+ from 1990 to 2021 and Projections for 2050: A Systematic Analysis Based on the 2021 Global Burden of Disease Study
Source: Research Square preprint supplement (doi:10.21203/rs.3.rs-6873532/v1), 2025-06-16
Supplement: Supplementary file 3 [file 582914b063edd3766022c4f9.xlsx]

## Sheet: Sheet1
	ASIR			ASPR			ASMR			ASDR
Location	1990 (per 100,000 population, 95% UI)	2021 (per 100,000 population, 95% UI)	EAPCs (95% CI)	1990 (per 100,000 population, 95% UI)	2021 (per 100,000 population, 95% UI)	EAPCs (95% CI)	1990 (per 100,000 population, 95% UI)	2021 (per 100,000 population, 95% UI)	EAPCs (95% CI)	1990 (per 100,000 population, 95% UI)	2021 (per 100,000 population, 95% UI)	EAPCs (95% CI)
Afghanistan	8.12(2.55,20.20)	12.06(4.76,25.97)	1.40(1.20,1.59)	20.96(6.98,53.60)	34.07(14.06,76.52)	1.69(1.45,1.92)	6.57(1.99,16.08)	9.46(3.60,20.09)	1.31(1.12,1.49)	178.96(58.55,448.68)	255.05(102.45,558.07)	1.26(1.08,1.44)
Albania	8.61(5.97,12.16)	9.69(5.94,14.73)	0.82(0.64,1.01)	26.51(18.31,37.57)	33.40(20.17,50.99)	1.32(1.05,1.60)	6.95(4.84,9.82)	7.62(4.71,11.44)	0.70(0.55,0.86)	183.12(128.12,257.96)	192.41(117.62,289.63)	0.60(0.43,0.77)
Algeria	6.18(3.68,9.37)	7.81(4.61,11.99)	1.06(0.97,1.14)	16.77(10.18,25.34)	25.07(14.81,38.23)	1.35(1.31,1.39)	5.13(3.04,7.84)	6.07(3.57,9.39)	1.03(0.89,1.17)	120.44(73.45,181.56)	145.50(86.25,222.21)	0.79(0.73,0.85)
American Samoa	10.35(6.07,15.94)	17.45(8.65,28.84)	1.80(1.70,1.89)	32.99(19.10,51.05)	60.54(29.59,100.74)	2.02(1.91,2.14)	6.46(3.85,9.98)	10.31(5.19,17.00)	1.69(1.61,1.76)	167.95(99.67,258.72)	269.43(134.74,442.61)	1.68(1.61,1.75)
Andorra	12.65(7.18,20.75)	9.19(5.31,14.58)	-0.76(-0.94,-0.58)	46.20(26.11,76.35)	36.22(20.75,57.88)	-0.51(-0.71,-0.30)	9.05(5.19,14.86)	6.35(3.69,9.93)	-0.85(-1.01,-0.68)	228.55(130.49,377.63)	157.81(90.98,246.09)	-0.91(-1.08,-0.75)
Angola	7.43(3.32,12.72)	12.66(5.99,21.12)	1.95(1.82,2.07)	19.00(8.72,32.66)	36.13(17.17,60.84)	2.35(2.19,2.51)	6.05(2.55,10.45)	9.97(4.71,16.61)	1.84(1.72,1.95)	164.56(73.26,284.02)	267.62(128.38,449.69)	1.81(1.68,1.93)
Antigua and Barbuda	20.60(16.40,25.57)	30.55(25.03,36.89)	1.39(1.21,1.56)	63.30(50.27,78.59)	99.34(80.87,120.78)	1.58(1.41,1.75)	15.97(12.73,19.82)	23.28(19.22,27.91)	1.33(1.15,1.51)	406.28(326.68,498.99)	582.44(479.88,698.42)	1.29(1.11,1.47)
Argentina	28.10(21.78,35.88)	22.75(18.03,28.22)	-0.43(-0.60,-0.26)	85.69(66.59,109.12)	77.01(60.86,95.91)	-0.10(-0.30,0.09)	21.76(16.86,27.75)	16.75(13.29,20.64)	-0.57(-0.73,-0.40)	563.02(439.60,712.96)	433.78(347.56,531.31)	-0.58(-0.74,-0.42)
Armenia	16.50(13.25,20.90)	21.93(17.86,26.50)	1.09(0.90,1.27)	52.14(41.80,66.40)	71.67(57.91,87.62)	1.30(1.08,1.52)	12.89(10.40,16.27)	17.32(14.08,20.74)	1.08(0.91,1.25)	354.78(285.85,450.21)	451.17(364.78,541.44)	0.96(0.76,1.15)
Australia	46.62(38.43,53.98)	22.18(17.28,27.56)	-2.28(-2.69,-1.86)	180.36(148.42,210.84)	89.15(70.13,110.84)	-2.12(-2.60,-1.64)	33.99(28.10,38.86)	16.38(12.73,20.25)	-2.23(-2.62,-1.85)	858.50(715.82,979.10)	377.85(298.40,464.41)	-2.52(-2.89,-2.14)
Austria	48.22(40.38,56.76)	25.62(20.15,31.71)	-1.81(-1.92,-1.70)	178.18(148.19,211.73)	102.02(80.19,126.84)	-1.47(-1.62,-1.32)	34.33(28.97,40.19)	18.26(14.27,22.44)	-1.86(-1.96,-1.76)	860.05(729.40,1005.78)	424.83(337.43,518.43)	-2.02(-2.14,-1.89)
Azerbaijan	9.05(5.72,13.41)	12.10(7.49,18.50)	1.34(0.98,1.71)	28.25(17.98,42.06)	39.69(24.36,61.45)	1.52(1.18,1.86)	7.03(4.42,10.37)	9.28(5.81,14.01)	1.35(0.97,1.73)	201.92(129.06,297.35)	261.32(162.84,394.55)	1.20(0.83,1.58)
Bahamas	30.45(23.76,38.61)	34.54(26.11,45.01)	0.66(0.54,0.77)	95.01(73.26,121.56)	114.56(86.12,151.25)	0.90(0.76,1.03)	22.85(17.96,28.70)	25.55(19.61,32.70)	0.60(0.50,0.70)	625.25(489.02,790.29)	681.48(519.87,878.08)	0.53(0.42,0.65)
Bahrain	29.58(18.88,44.27)	33.79(19.71,49.77)	0.11(-0.01,0.23)	85.49(54.31,129.35)	113.59(65.86,167.93)	0.67(0.56,0.78)	23.16(14.97,34.41)	25.49(15.09,37.43)	-0.03(-0.15,0.10)	590.56(380.72,878.13)	624.07(365.79,913.95)	-0.15(-0.27,-0.03)
Bangladesh	10.24(5.59,16.78)	14.24(7.72,24.41)	0.94(0.88,1.00)	27.29(15.18,45.05)	44.70(24.35,76.79)	1.49(1.43,1.54)	8.19(4.33,13.31)	10.76(5.83,18.90)	0.76(0.70,0.82)	222.88(121.41,363.60)	288.85(156.21,509.85)	0.72(0.67,0.77)
Barbados	27.08(22.03,33.09)	28.49(20.86,37.61)	0.61(0.46,0.76)	83.07(66.98,102.12)	93.46(67.36,125.46)	0.82(0.67,0.98)	20.99(17.27,25.38)	21.78(16.21,28.42)	0.57(0.42,0.72)	531.13(434.72,644.88)	537.69(394.55,709.44)	0.52(0.36,0.67)
Belarus	20.96(16.79,25.95)	23.22(16.90,30.83)	0.11(-0.42,0.65)	66.26(52.98,82.61)	81.08(58.40,109.16)	0.48(-0.01,0.96)	16.70(13.50,20.59)	17.94(13.11,23.67)	-0.00(-0.55,0.55)	475.78(384.85,587.58)	500.50(365.76,662.47)	-0.08(-0.62,0.47)
Belgium	46.87(38.46,55.78)	25.68(19.92,32.15)	-1.99(-2.10,-1.88)	168.14(137.79,200.88)	96.25(74.69,120.87)	-1.85(-1.98,-1.73)	34.16(28.21,40.41)	19.03(14.80,23.72)	-1.92(-2.04,-1.80)	850.29(707.27,997.73)	436.52(343.75,539.57)	-2.19(-2.30,-2.09)
Belize	7.77(6.02,9.88)	11.39(9.07,14.07)	1.30(0.93,1.67)	24.22(18.67,30.94)	37.22(29.50,46.19)	1.44(1.11,1.77)	5.84(4.55,7.39)	8.43(6.78,10.35)	1.22(0.82,1.62)	161.35(125.77,203.82)	230.01(185.56,282.52)	1.20(0.84,1.56)
Benin	5.68(3.50,8.46)	8.24(4.82,12.74)	1.14(1.07,1.20)	15.21(9.38,22.81)	23.28(13.51,36.11)	1.28(1.20,1.35)	4.53(2.81,6.69)	6.51(3.81,10.04)	1.13(1.07,1.19)	124.62(77.47,184.25)	173.94(100.99,268.96)	1.02(0.95,1.08)
Bermuda	39.58(29.67,51.06)	30.35(23.00,40.15)	-1.23(-1.47,-0.98)	125.42(93.73,162.54)	113.43(85.57,150.66)	-0.65(-0.87,-0.43)	30.62(22.98,39.33)	22.31(17.05,29.48)	-1.36(-1.61,-1.11)	752.24(563.26,962.14)	534.17(409.34,702.30)	-1.47(-1.72,-1.22)
Bhutan	10.74(5.69,18.82)	16.72(9.29,29.77)	1.33(1.28,1.39)	28.75(15.40,50.57)	51.19(28.20,91.35)	1.79(1.73,1.85)	8.56(4.50,14.89)	12.80(7.20,22.95)	1.22(1.16,1.28)	234.21(124.86,408.48)	339.03(189.72,607.40)	1.09(1.03,1.15)
Bolivia (Plurinational State of)	10.24(6.04,19.40)	19.28(11.19,32.04)	2.15(1.98,2.32)	26.61(15.61,50.41)	57.16(33.00,94.90)	2.60(2.40,2.80)	8.35(4.97,15.59)	15.07(8.77,24.80)	2.02(1.85,2.18)	219.31(129.95,411.17)	391.39(227.03,642.66)	1.97(1.80,2.14)
Bosnia and Herzegovina	20.01(15.18,25.63)	25.96(17.24,35.83)	1.26(1.09,1.44)	64.61(48.69,83.37)	89.86(58.86,124.43)	1.56(1.33,1.80)	15.51(11.84,19.81)	19.98(13.27,27.60)	1.21(1.06,1.35)	427.14(326.26,543.48)	523.38(347.07,724.40)	1.07(0.90,1.24)
Botswana	13.06(7.14,21.40)	19.23(9.70,31.27)	1.51(1.33,1.70)	34.27(18.69,56.59)	52.74(26.04,86.25)	1.68(1.46,1.91)	10.69(5.81,17.16)	15.46(7.90,24.78)	1.45(1.27,1.63)	273.48(148.65,443.97)	391.21(194.19,630.88)	1.42(1.24,1.61)
Brazil	15.58(14.19,16.79)	17.38(15.57,19.01)	0.08(-0.06,0.21)	45.46(41.70,48.95)	57.27(51.86,62.36)	0.45(0.32,0.58)	12.18(11.08,13.11)	12.99(11.56,14.24)	-0.03(-0.16,0.10)	320.09(294.25,343.35)	340.09(307.68,370.31)	-0.07(-0.19,0.05)
Brunei Darussalam	29.00(18.61,44.27)	32.65(21.97,46.73)	0.67(0.55,0.79)	88.17(56.15,135.90)	119.10(79.66,170.90)	1.26(1.12,1.40)	22.01(14.30,33.26)	22.22(14.91,31.68)	0.33(0.22,0.44)	614.73(397.96,934.93)	615.15(414.23,875.61)	0.28(0.21,0.35)
Bulgaria	25.66(21.32,30.50)	36.96(28.42,47.16)	0.96(0.67,1.26)	91.73(75.62,109.90)	135.70(103.04,175.58)	1.01(0.73,1.28)	18.48(15.49,21.88)	26.60(20.88,33.28)	0.99(0.68,1.30)	520.85(435.89,617.62)	731.80(571.48,922.04)	0.88(0.59,1.17)
Burkina Faso	6.07(3.27,9.38)	8.51(4.98,13.45)	1.14(1.05,1.23)	15.86(8.49,24.42)	23.46(13.63,37.47)	1.34(1.25,1.42)	4.94(2.64,7.61)	6.87(3.99,10.87)	1.12(1.04,1.21)	131.47(69.68,201.78)	179.55(103.76,287.54)	1.07(0.97,1.17)
Burundi	17.17(8.81,30.09)	18.31(10.44,29.34)	0.02(-0.08,0.12)	43.18(21.76,76.63)	49.64(28.12,79.80)	0.39(0.29,0.50)	14.00(7.11,24.21)	14.76(8.38,23.51)	-0.00(-0.10,0.09)	377.69(190.08,660.26)	391.25(221.38,625.66)	-0.07(-0.17,0.03)
Cabo Verde	2.27(1.31,3.75)	9.04(3.25,15.56)	4.91(4.08,5.74)	6.99(4.00,11.35)	29.62(10.69,50.02)	4.97(4.19,5.76)	1.71(0.99,2.81)	6.77(2.37,11.81)	5.00(4.15,5.87)	48.47(28.02,78.05)	181.19(63.99,307.84)	4.63(3.81,5.45)
Cambodia	13.49(7.55,25.63)	30.93(17.15,52.51)	2.71(2.66,2.76)	40.63(22.50,78.28)	111.06(60.84,189.55)	3.32(3.27,3.37)	8.61(4.82,16.18)	17.94(10.11,30.01)	2.41(2.36,2.46)	246.64(137.76,473.58)	503.86(280.66,846.79)	2.34(2.29,2.39)
Cameroon	6.91(4.44,10.28)	10.18(5.81,16.38)	1.22(1.12,1.31)	18.53(11.91,27.64)	28.78(16.33,46.74)	1.37(1.21,1.53)	5.53(3.55,8.19)	8.01(4.53,12.86)	1.17(1.10,1.25)	149.72(96.37,221.83)	213.64(120.19,344.99)	1.14(1.05,1.23)
Canada	31.71(26.69,37.08)	25.22(20.00,31.09)	-0.62(-0.84,-0.41)	122.29(101.76,144.33)	100.67(79.95,124.80)	-0.52(-0.75,-0.28)	22.34(18.91,25.81)	18.02(14.31,22.00)	-0.54(-0.76,-0.32)	575.19(489.21,665.07)	426.10(343.18,516.83)	-0.85(-1.05,-0.66)
Central African Republic	9.03(5.05,16.16)	11.10(6.20,18.19)	0.67(0.61,0.74)	22.33(12.66,41.10)	28.32(15.94,47.06)	0.79(0.68,0.90)	7.42(4.12,13.10)	9.08(5.07,14.84)	0.68(0.62,0.74)	200.68(113.38,362.76)	243.38(136.93,401.39)	0.64(0.57,0.70)
Chad	4.61(2.39,7.37)	7.28(3.88,11.73)	1.57(1.51,1.63)	12.05(6.24,19.17)	19.62(10.42,31.82)	1.66(1.63,1.70)	3.71(1.89,5.96)	5.84(3.05,9.57)	1.56(1.49,1.62)	101.41(51.75,162.16)	157.40(82.80,259.17)	1.52(1.45,1.59)
Chile	18.41(14.84,22.47)	19.64(15.45,24.40)	0.13(-0.20,0.46)	57.09(45.85,70.31)	73.47(57.31,91.55)	0.74(0.37,1.10)	14.03(11.35,17.07)	13.83(10.93,17.06)	-0.10(-0.42,0.23)	368.28(299.78,447.58)	361.86(287.20,444.71)	-0.15(-0.45,0.16)
China	11.00(8.25,14.34)	10.92(7.81,14.53)	-0.54(-0.71,-0.36)	33.83(24.95,44.28)	41.83(29.67,56.02)	0.26(0.12,0.41)	8.38(6.37,10.88)	7.48(5.39,9.92)	-0.95(-1.15,-0.75)	235.93(176.85,307.89)	207.41(148.63,276.52)	-0.96(-1.16,-0.77)
Colombia	19.32(15.99,22.93)	22.16(16.75,28.59)	0.42(0.25,0.59)	58.20(48.00,69.60)	79.18(59.73,103.10)	1.04(0.87,1.21)	14.85(12.40,17.58)	15.89(12.10,20.22)	0.21(0.04,0.37)	398.14(334.12,469.21)	426.69(325.93,543.86)	0.21(0.02,0.40)
Comoros	17.32(9.98,27.63)	25.38(13.16,43.34)	1.12(1.05,1.18)	45.90(26.03,73.78)	72.28(37.17,124.14)	1.32(1.25,1.40)	13.91(8.08,22.29)	19.94(10.50,33.67)	1.06(1.00,1.13)	376.82(214.77,607.08)	532.33(279.06,899.19)	0.99(0.92,1.06)
Congo	11.21(6.64,18.95)	17.24(10.02,27.49)	1.40(1.29,1.50)	28.66(16.89,49.48)	49.41(28.68,79.65)	1.80(1.67,1.94)	9.10(5.36,15.07)	13.41(7.76,20.81)	1.26(1.16,1.35)	244.00(144.51,411.72)	361.45(209.39,566.45)	1.28(1.18,1.38)
Cook Islands	5.75(3.46,9.08)	8.40(4.88,13.40)	1.24(1.14,1.34)	18.70(11.24,29.78)	32.88(18.90,52.76)	1.83(1.74,1.92)	3.56(2.16,5.60)	4.69(2.78,7.46)	0.93(0.81,1.04)	89.96(54.88,141.34)	118.66(69.91,188.28)	0.95(0.83,1.08)
Costa Rica	10.54(8.39,13.15)	17.08(12.97,21.91)	1.25(0.91,1.59)	34.01(26.91,42.45)	62.73(47.23,80.64)	1.64(1.30,1.98)	7.95(6.34,9.87)	12.13(9.28,15.38)	1.09(0.74,1.43)	206.53(165.41,256.05)	323.53(247.06,409.08)	1.14(0.80,1.47)
Cote d'Ivoire	11.67(7.30,17.46)	16.03(9.48,25.20)	1.08(1.01,1.14)	30.38(18.98,45.41)	44.85(26.21,71.16)	1.30(1.19,1.41)	9.53(6.02,14.34)	12.76(7.52,20.18)	1.00(0.94,1.06)	249.22(157.06,373.41)	333.62(194.21,529.74)	1.00(0.92,1.07)
Croatia	40.74(33.30,48.47)	37.22(28.96,46.86)	-0.10(-0.31,0.12)	167.36(135.52,200.90)	167.60(129.54,211.19)	0.20(-0.05,0.45)	26.51(21.85,31.04)	23.57(18.68,29.33)	-0.15(-0.35,0.06)	693.06(572.86,810.17)	593.70(471.40,738.66)	-0.29(-0.50,-0.07)
Cuba	11.97(9.31,15.11)	17.98(13.61,23.36)	0.90(0.69,1.12)	39.93(30.88,50.57)	66.32(49.64,87.25)	1.24(1.02,1.46)	8.78(6.86,11.03)	12.71(9.74,16.48)	0.82(0.61,1.02)	238.17(187.00,298.34)	339.77(258.84,440.99)	0.77(0.57,0.98)
Cyprus	31.53(19.74,51.37)	26.80(16.45,39.93)	-0.38(-0.57,-0.19)	101.48(64.39,156.14)	102.80(63.56,153.66)	0.21(-0.04,0.47)	24.36(15.14,40.73)	19.65(12.06,29.11)	-0.56(-0.74,-0.37)	580.66(366.33,913.33)	457.50(286.64,670.71)	-0.64(-0.81,-0.47)
Czechia	36.71(31.56,42.59)	33.16(26.27,40.87)	-0.27(-0.63,0.10)	133.38(113.58,156.22)	131.84(103.93,163.74)	0.01(-0.42,0.44)	25.45(22.08,29.23)	22.83(18.20,27.94)	-0.26(-0.59,0.07)	694.53(604.52,795.92)	572.76(460.96,697.04)	-0.54(-0.87,-0.20)
Democratic People's Republic of Korea	12.56(7.07,20.74)	17.72(10.13,28.93)	1.23(1.16,1.31)	43.14(24.29,71.33)	70.94(40.73,116.33)	1.75(1.65,1.84)	7.04(3.91,11.44)	8.77(4.93,14.16)	0.83(0.76,0.90)	202.41(113.67,331.22)	254.86(146.17,412.03)	0.85(0.79,0.92)
Democratic Republic of the Congo	8.64(4.62,14.79)	13.09(6.50,21.36)	1.41(1.15,1.68)	22.43(12.16,38.70)	36.91(18.60,60.60)	1.69(1.38,2.01)	7.02(3.72,11.93)	10.37(4.98,16.88)	1.35(1.10,1.59)	188.52(102.13,321.44)	278.16(136.18,453.74)	1.35(1.09,1.60)
Denmark	37.62(29.67,44.94)	30.73(23.96,38.27)	-1.33(-1.88,-0.78)	122.52(96.88,147.19)	107.37(83.51,134.06)	-1.02(-1.62,-0.41)	29.04(22.91,34.64)	23.57(18.36,29.21)	-1.39(-1.91,-0.87)	771.39(612.84,915.41)	535.14(421.85,658.81)	-1.91(-2.44,-1.39)
Djibouti	17.62(9.37,28.77)	23.25(11.40,39.65)	0.88(0.83,0.92)	47.17(24.95,77.82)	66.27(32.06,114.07)	1.05(1.02,1.09)	14.12(7.40,22.97)	18.32(9.04,30.93)	0.83(0.78,0.89)	379.63(196.52,620.47)	486.29(236.50,832.21)	0.79(0.73,0.84)
Dominica	13.73(7.30,20.86)	14.30(9.19,21.39)	0.19(0.05,0.33)	37.53(20.75,56.52)	43.05(27.58,64.27)	0.43(0.31,0.55)	11.28(5.89,17.25)	11.22(7.26,16.80)	0.09(-0.08,0.25)	270.84(148.25,411.66)	282.41(181.70,422.03)	0.20(0.07,0.34)
Dominican Republic	7.11(4.61,10.64)	9.87(6.30,14.74)	1.27(1.14,1.40)	20.81(13.48,31.17)	31.42(20.05,46.98)	1.57(1.44,1.69)	5.58(3.61,8.36)	7.48(4.74,11.07)	1.19(1.05,1.34)	148.44(96.61,220.93)	198.02(125.87,292.44)	1.17(1.05,1.28)
Ecuador	2.53(1.96,3.18)	17.83(12.83,24.25)	6.55(4.68,8.45)	7.01(5.42,8.82)	57.80(41.18,79.67)	7.10(5.17,9.07)	2.05(1.59,2.56)	13.41(9.77,17.98)	6.34(4.51,8.19)	51.77(40.19,64.45)	349.21(252.32,470.28)	6.41(4.54,8.30)
Egypt	4.96(2.79,11.76)	12.77(8.62,18.31)	3.74(3.10,4.37)	13.56(7.82,30.27)	38.07(25.38,54.80)	3.85(3.28,4.43)	3.98(2.20,9.72)	9.97(6.80,14.05)	3.76(3.10,4.43)	102.44(58.62,236.23)	246.99(167.28,347.57)	3.50(2.89,4.12)
El Salvador	9.48(6.95,13.38)	18.08(12.06,25.62)	2.27(2.02,2.52)	28.02(20.55,38.95)	62.42(40.97,89.38)	2.85(2.55,3.16)	7.30(5.33,10.40)	13.10(8.74,18.38)	2.07(1.85,2.29)	200.18(147.61,279.87)	355.34(234.20,501.47)	2.05(1.82,2.27)
Equatorial Guinea	8.17(4.18,14.78)	16.48(8.45,28.42)	2.55(2.41,2.69)	20.85(10.80,38.28)	50.37(25.46,88.16)	3.21(3.05,3.36)	6.68(3.43,12.13)	12.61(6.49,21.55)	2.31(2.18,2.45)	181.19(94.85,333.04)	335.90(169.71,581.42)	2.23(2.11,2.36)
Eritrea	16.24(9.56,27.39)	24.01(13.55,39.57)	1.23(1.15,1.32)	40.29(23.44,69.05)	64.50(36.25,107.36)	1.43(1.35,1.52)	13.12(7.88,21.74)	19.24(10.78,31.18)	1.22(1.13,1.31)	360.15(214.19,607.59)	512.11(284.81,837.71)	1.12(1.04,1.21)
Estonia	32.70(26.51,39.83)	25.85(19.75,32.97)	-0.79(-1.64,0.07)	106.47(86.08,130.41)	91.56(69.68,117.78)	-0.55(-1.41,0.32)	25.74(20.94,31.25)	20.30(15.59,25.84)	-0.77(-1.62,0.09)	695.08(564.19,844.29)	511.54(393.59,650.43)	-1.07(-1.91,-0.23)
Eswatini	17.29(8.74,30.93)	24.78(12.61,42.66)	1.18(1.04,1.31)	44.77(22.72,80.09)	65.99(33.02,115.66)	1.17(1.10,1.24)	14.21(7.21,24.91)	19.97(10.36,34.43)	1.13(0.99,1.27)	360.26(184.84,626.38)	511.88(261.47,889.53)	1.16(1.01,1.32)
Ethiopia	15.94(5.80,30.61)	22.34(10.85,33.00)	1.01(0.90,1.13)	38.58(14.73,75.56)	63.42(30.79,93.21)	1.59(1.48,1.71)	13.14(4.65,25.15)	17.73(8.57,26.10)	0.90(0.79,1.00)	353.84(132.77,690.21)	466.06(223.65,686.43)	0.80(0.69,0.91)
Fiji	10.80(6.73,16.33)	12.92(7.69,20.22)	0.46(0.34,0.58)	33.66(20.94,50.79)	43.03(25.43,67.69)	0.64(0.53,0.76)	6.70(4.16,10.13)	7.77(4.69,11.99)	0.39(0.27,0.50)	184.86(114.91,276.86)	208.07(125.34,321.73)	0.32(0.23,0.42)
Finland	41.32(34.54,48.78)	28.13(21.77,35.26)	-1.19(-1.38,-1.00)	159.38(131.92,190.16)	120.39(92.62,151.41)	-0.88(-1.14,-0.62)	28.11(23.76,32.82)	18.52(14.34,22.96)	-1.24(-1.40,-1.08)	710.58(604.46,826.49)	435.88(341.92,537.16)	-1.55(-1.71,-1.38)
France	37.96(31.27,44.41)	27.41(20.99,34.74)	-0.97(-1.08,-0.86)	140.95(115.48,166.28)	115.50(88.74,146.51)	-0.52(-0.70,-0.34)	27.06(22.37,31.36)	18.80(14.35,23.74)	-1.10(-1.19,-1.01)	673.84(561.76,776.26)	431.40(334.57,539.36)	-1.41(-1.52,-1.30)
Gabon	12.20(7.44,19.17)	17.70(10.06,28.13)	1.09(1.03,1.15)	32.77(20.07,51.84)	52.61(29.69,84.64)	1.38(1.31,1.44)	9.84(5.97,15.41)	13.74(7.87,21.73)	0.99(0.93,1.05)	260.77(158.86,410.64)	361.64(204.55,573.61)	0.96(0.90,1.02)
Gambia	5.38(3.39,7.98)	8.66(4.93,14.05)	1.26(1.03,1.48)	14.52(9.05,21.53)	24.62(13.92,40.15)	1.36(1.11,1.62)	4.32(2.73,6.47)	6.78(3.83,10.94)	1.21(1.01,1.41)	115.27(72.21,172.55)	181.47(101.70,291.51)	1.18(0.94,1.41)
Georgia	8.82(6.74,11.38)	39.54(32.47,47.54)	5.90(5.47,6.33)	30.15(22.78,39.20)	128.26(104.56,155.67)	5.70(5.28,6.12)	6.52(5.06,8.34)	30.99(25.43,36.84)	6.18(5.72,6.64)	193.28(148.85,248.18)	834.48(682.80,992.23)	5.79(5.36,6.23)
Germany	49.13(40.32,57.52)	28.86(22.82,35.48)	-1.84(-1.91,-1.76)	190.02(154.87,223.89)	119.57(94.80,147.61)	-1.60(-1.68,-1.52)	33.83(27.98,39.10)	20.00(15.80,24.42)	-1.74(-1.84,-1.64)	850.05(705.40,976.29)	476.49(382.02,577.74)	-1.87(-1.97,-1.77)
Ghana	6.17(3.85,9.18)	11.21(6.05,18.68)	2.00(1.96,2.04)	17.03(10.53,25.52)	32.92(17.79,55.06)	2.16(2.11,2.21)	4.88(3.05,7.31)	8.73(4.71,14.63)	2.00(1.95,2.04)	133.36(82.84,200.06)	232.64(125.75,388.38)	1.88(1.84,1.93)
Greece	29.39(24.88,34.24)	29.98(24.81,35.52)	-0.33(-0.54,-0.13)	109.24(91.75,128.40)	118.08(97.65,141.74)	-0.05(-0.22,0.12)	21.16(18.03,24.44)	21.21(17.54,24.90)	-0.46(-0.70,-0.22)	529.12(453.69,609.16)	522.89(438.25,612.86)	-0.39(-0.57,-0.20)
Greenland	54.41(37.39,78.48)	38.00(21.66,60.43)	-1.29(-1.51,-1.08)	159.16(109.07,229.85)	141.85(79.07,225.93)	-0.43(-0.58,-0.29)	41.93(28.78,60.27)	25.55(15.02,40.43)	-1.74(-2.03,-1.46)	1098.36(758.30,1562.34)	738.74(427.87,1163.72)	-1.44(-1.64,-1.24)
Grenada	24.23(16.59,34.42)	35.10(27.90,43.52)	1.60(1.43,1.77)	72.14(48.32,104.30)	109.83(86.20,137.97)	1.70(1.56,1.84)	18.66(13.03,26.19)	26.90(21.54,32.86)	1.60(1.41,1.79)	501.91(344.02,716.64)	690.82(551.36,849.86)	1.47(1.29,1.66)
Guam	13.47(8.89,22.88)	18.60(13.04,26.06)	1.98(1.54,2.43)	45.08(29.24,77.90)	80.43(56.03,112.04)	2.65(2.18,3.12)	8.35(5.64,13.79)	9.01(6.33,12.61)	1.41(0.95,1.88)	202.99(135.93,343.29)	281.99(198.76,391.43)	1.94(1.54,2.34)
Guatemala	4.08(3.40,4.84)	9.75(7.65,12.16)	3.42(2.97,3.88)	10.70(8.87,12.77)	30.80(24.06,38.66)	4.12(3.62,4.62)	3.33(2.80,3.94)	7.29(5.79,9.04)	3.09(2.65,3.52)	85.98(72.08,101.62)	199.89(158.64,248.87)	3.39(2.91,3.86)
Guinea	6.60(4.06,9.91)	9.12(4.87,14.56)	1.02(0.99,1.04)	17.00(10.50,25.46)	24.72(13.04,39.75)	1.14(1.12,1.17)	5.33(3.29,8.00)	7.26(3.84,11.64)	1.00(0.97,1.02)	144.93(89.95,216.89)	195.37(102.31,314.03)	0.95(0.93,0.98)
Guinea-Bissau	6.27(3.79,10.19)	10.11(6.04,16.24)	1.60(1.56,1.64)	15.94(9.58,26.25)	27.17(16.03,44.04)	1.77(1.74,1.79)	5.06(3.08,8.08)	8.03(4.84,12.69)	1.56(1.51,1.61)	140.05(84.75,226.46)	218.33(131.87,347.01)	1.50(1.46,1.55)
Guyana	21.00(16.33,26.51)	31.96(22.78,43.63)	1.69(1.27,2.11)	57.34(44.22,72.96)	97.26(68.26,134.98)	2.01(1.58,2.43)	16.62(12.95,21.04)	24.11(17.58,32.75)	1.56(1.15,1.96)	448.78(349.02,568.02)	667.27(480.02,919.92)	1.65(1.23,2.07)
Haiti	15.81(7.98,33.22)	21.24(11.93,39.35)	1.04(0.93,1.15)	39.45(20.28,84.33)	56.59(31.46,106.09)	1.26(1.13,1.39)	12.96(6.49,26.18)	17.11(9.67,31.67)	0.99(0.89,1.09)	348.44(179.74,720.51)	453.66(256.28,852.56)	0.95(0.85,1.05)
Honduras	14.93(9.66,22.07)	25.71(14.31,46.28)	1.71(1.54,1.89)	43.29(28.20,63.77)	79.49(44.00,141.30)	1.93(1.76,2.10)	11.51(7.36,17.02)	19.31(10.65,34.62)	1.65(1.48,1.82)	323.58(208.69,474.94)	534.43(293.43,952.89)	1.60(1.44,1.75)
Hungary	33.87(28.07,39.94)	30.06(24.10,36.68)	-0.25(-0.53,0.03)	109.25(89.74,130.01)	108.50(86.93,132.98)	0.08(-0.24,0.41)	26.55(22.11,31.10)	22.78(18.33,27.50)	-0.32(-0.58,-0.06)	702.91(586.05,822.46)	595.86(482.32,719.63)	-0.38(-0.65,-0.12)
Iceland	45.92(36.36,57.23)	27.06(20.54,34.70)	-1.79(-2.00,-1.58)	172.74(135.97,216.84)	106.75(81.27,136.78)	-1.72(-1.95,-1.50)	32.84(26.18,40.68)	19.49(14.78,24.96)	-1.65(-1.86,-1.44)	821.71(656.32,1016.58)	453.87(349.76,577.32)	-2.01(-2.20,-1.81)
India	10.31(7.37,13.75)	16.20(13.23,19.90)	1.32(1.20,1.44)	28.73(20.65,38.29)	49.51(40.17,60.89)	1.62(1.48,1.75)	8.02(5.74,10.68)	12.32(10.08,15.16)	1.25(1.13,1.37)	225.06(161.55,301.32)	328.84(268.44,406.04)	1.09(0.97,1.21)
Indonesia	14.60(9.89,26.64)	21.62(13.96,37.69)	1.09(0.97,1.21)	46.48(31.64,84.74)	78.59(50.04,135.72)	1.47(1.33,1.61)	8.90(6.03,16.16)	12.27(8.03,21.52)	0.90(0.80,1.01)	258.04(176.08,470.48)	346.79(223.65,601.37)	0.81(0.71,0.92)
Iran (Islamic Republic of)	5.85(4.08,8.38)	10.18(6.81,12.57)	2.14(1.98,2.30)	18.26(12.64,26.10)	35.92(23.44,44.89)	2.47(2.30,2.65)	4.44(3.10,6.33)	7.41(5.06,9.07)	2.04(1.87,2.20)	118.22(83.09,169.24)	191.31(130.66,233.32)	1.93(1.77,2.10)
Iraq	10.17(6.00,17.11)	15.36(9.54,23.52)	1.44(1.31,1.57)	31.56(18.56,53.22)	53.16(32.73,81.93)	1.81(1.65,1.98)	7.55(4.48,12.64)	11.01(6.88,16.59)	1.30(1.17,1.43)	213.68(127.39,359.83)	299.27(186.19,453.88)	1.18(1.07,1.30)
Ireland	51.37(42.38,61.10)	32.91(25.35,41.84)	-1.32(-1.47,-1.17)	188.22(153.75,225.61)	130.40(100.63,165.86)	-1.04(-1.23,-0.85)	36.48(30.37,42.85)	23.57(18.12,29.71)	-1.29(-1.44,-1.14)	954.21(796.20,1115.84)	561.42(437.70,703.12)	-1.62(-1.76,-1.48)
Israel	37.71(30.80,45.25)	23.87(18.45,29.97)	-1.48(-1.64,-1.32)	131.04(106.67,158.10)	89.28(69.27,112.31)	-1.15(-1.33,-0.96)	27.74(22.86,33.04)	17.61(13.65,22.02)	-1.53(-1.68,-1.37)	705.91(584.46,836.88)	415.32(326.88,517.86)	-1.69(-1.85,-1.54)
Italy	29.76(26.71,32.64)	26.14(22.56,29.40)	-0.47(-0.61,-0.32)	111.26(99.14,123.87)	104.93(91.80,118.87)	-0.19(-0.40,0.02)	20.68(18.88,22.10)	18.36(15.88,20.25)	-0.44(-0.57,-0.31)	541.10(500.42,575.62)	446.15(398.05,485.65)	-0.67(-0.79,-0.54)
Jamaica	19.47(14.82,24.96)	24.02(16.84,33.49)	0.67(0.49,0.85)	61.09(46.13,78.75)	80.80(56.00,114.14)	0.91(0.71,1.11)	14.76(11.29,18.95)	17.74(12.50,24.55)	0.57(0.41,0.74)	390.21(298.76,501.17)	470.46(328.09,654.83)	0.61(0.42,0.79)
Japan	18.68(16.98,20.15)	18.75(16.20,20.91)	0.03(-0.14,0.20)	72.91(65.79,79.97)	88.32(76.45,99.54)	0.69(0.40,0.97)	12.85(11.88,13.54)	11.27(9.85,12.20)	-0.46(-0.54,-0.37)	361.10(339.44,377.98)	310.20(281.65,330.35)	-0.48(-0.57,-0.39)
Jordan	11.31(6.56,17.68)	14.66(8.25,22.52)	0.72(0.39,1.04)	34.23(19.94,53.87)	50.92(28.52,78.87)	1.23(0.94,1.53)	8.64(5.07,13.45)	10.76(6.10,16.31)	0.57(0.21,0.92)	229.40(134.97,358.59)	275.31(155.44,418.61)	0.44(0.13,0.76)
Kazakhstan	18.85(15.31,23.26)	22.03(17.49,27.21)	0.21(-0.05,0.48)	60.48(48.50,75.42)	77.18(60.55,96.06)	0.47(0.24,0.69)	14.43(11.74,17.59)	16.40(13.11,20.02)	0.14(-0.15,0.43)	416.99(339.68,510.49)	467.97(371.72,572.12)	0.04(-0.24,0.32)
Kenya	11.60(4.73,16.62)	18.85(11.89,26.38)	1.72(1.63,1.81)	31.54(12.89,45.04)	55.69(34.70,78.34)	1.95(1.83,2.08)	9.25(3.77,13.25)	14.68(9.40,20.42)	1.68(1.58,1.78)	247.48(100.38,353.70)	393.78(247.97,553.66)	1.68(1.58,1.77)
Kiribati	2.36(1.42,3.67)	3.97(2.09,6.49)	1.66(1.47,1.85)	6.54(3.90,10.21)	11.89(6.15,19.64)	1.91(1.70,2.11)	1.57(0.95,2.43)	2.55(1.35,4.10)	1.58(1.42,1.74)	42.66(25.84,65.87)	67.51(35.19,109.07)	1.51(1.36,1.67)
Kuwait	18.10(13.98,22.95)	12.12(8.86,16.23)	-0.98(-1.34,-0.62)	60.50(46.60,77.39)	46.09(33.87,62.23)	-0.67(-1.02,-0.31)	13.30(10.32,16.86)	8.61(6.34,11.53)	-0.99(-1.36,-0.61)	348.15(271.19,440.11)	220.46(163.65,294.91)	-1.18(-1.55,-0.82)
Kyrgyzstan	13.31(10.26,16.96)	23.67(17.62,30.86)	3.19(2.51,3.88)	39.28(30.03,50.29)	78.30(57.71,103.14)	3.41(2.79,4.03)	10.76(8.31,13.70)	18.17(13.72,23.46)	3.15(2.41,3.90)	290.54(224.72,369.75)	509.64(384.97,660.77)	3.08(2.42,3.74)
Lao People's Democratic Republic	13.57(6.95,29.25)	25.38(14.41,43.61)	2.19(2.10,2.29)	38.68(19.65,85.25)	85.39(48.11,147.52)	2.76(2.65,2.86)	8.78(4.52,18.59)	15.03(8.60,25.40)	1.92(1.84,2.00)	251.86(127.92,549.47)	422.01(239.29,716.26)	1.84(1.75,1.93)
Latvia	25.79(21.10,31.11)	34.47(26.61,43.66)	0.78(0.40,1.15)	77.24(62.76,93.83)	109.52(84.18,140.02)	0.92(0.57,1.27)	21.38(17.54,25.76)	28.45(21.98,36.11)	0.79(0.40,1.19)	606.35(498.24,730.38)	777.49(602.51,989.07)	0.61(0.24,0.98)
Lebanon	16.97(10.51,27.93)	20.77(12.54,31.00)	0.86(0.61,1.12)	51.65(31.84,86.21)	73.12(44.70,108.67)	1.29(1.05,1.54)	13.13(8.20,21.12)	15.52(9.17,23.07)	0.78(0.52,1.05)	336.56(210.49,545.36)	379.45(228.18,558.11)	0.58(0.33,0.82)
Lesotho	12.37(7.24,19.66)	22.37(11.69,41.84)	2.26(2.04,2.48)	32.10(18.75,51.15)	56.34(28.79,107.76)	2.03(1.92,2.14)	10.23(5.88,16.46)	18.36(9.81,33.23)	2.26(2.03,2.48)	259.72(149.92,415.09)	469.49(246.79,864.64)	2.27(2.05,2.50)
Liberia	6.05(3.79,9.22)	9.98(5.63,16.09)	1.85(1.72,1.98)	15.58(9.68,23.91)	28.54(16.07,46.10)	2.23(2.08,2.38)	4.88(3.09,7.42)	7.80(4.41,12.62)	1.76(1.63,1.88)	132.31(83.39,201.79)	209.30(118.31,339.93)	1.71(1.58,1.85)
Libya	16.26(9.10,25.83)	25.18(15.13,38.78)	1.53(1.34,1.71)	50.22(28.07,79.87)	85.34(51.22,131.98)	1.70(1.50,1.90)	12.38(6.87,19.55)	18.61(11.18,28.69)	1.45(1.28,1.61)	330.35(184.96,521.78)	490.88(295.64,756.61)	1.37(1.21,1.53)
Lithuania	29.90(24.68,35.61)	31.36(24.27,39.62)	-0.48(-0.96,0.00)	88.77(72.76,106.42)	96.66(74.53,122.98)	-0.33(-0.83,0.17)	24.38(20.18,28.85)	25.56(19.69,31.96)	-0.49(-0.95,-0.02)	668.10(555.58,788.01)	668.92(515.35,836.60)	-0.62(-1.10,-0.12)
Luxembourg	51.55(42.97,61.16)	31.11(25.13,37.80)	-1.22(-1.41,-1.04)	178.78(148.28,214.32)	118.35(95.69,144.59)	-0.85(-1.10,-0.59)	38.12(31.99,44.72)	22.92(18.64,27.51)	-1.26(-1.44,-1.09)	950.27(801.41,1113.47)	531.14(434.73,639.01)	-1.46(-1.65,-1.28)
Madagascar	15.53(9.63,23.61)	17.59(9.91,29.08)	0.39(0.20,0.59)	40.78(25.07,62.43)	49.24(27.61,81.88)	0.61(0.40,0.82)	12.51(7.80,18.89)	13.84(7.73,22.86)	0.34(0.14,0.54)	338.50(209.77,510.21)	375.39(208.08,622.47)	0.34(0.14,0.54)
Malawi	10.00(6.25,15.15)	15.13(6.91,25.94)	1.36(1.28,1.44)	25.47(15.85,38.64)	42.10(19.03,72.35)	1.75(1.60,1.89)	8.14(5.12,12.21)	12.01(5.45,20.54)	1.30(1.22,1.37)	217.87(137.32,328.09)	320.03(143.04,548.29)	1.27(1.19,1.35)
Malaysia	15.62(9.72,24.21)	22.80(14.37,34.23)	1.54(1.15,1.92)	51.46(32.14,79.61)	88.84(56.41,133.25)	2.08(1.66,2.49)	9.47(5.90,14.71)	12.62(8.02,18.93)	1.26(0.90,1.62)	261.54(164.39,404.02)	342.56(219.38,507.48)	1.20(0.85,1.55)
Maldives	18.10(8.58,46.61)	23.28(13.77,36.32)	0.45(0.16,0.73)	55.68(26.08,152.88)	95.53(55.97,151.09)	1.46(1.08,1.84)	11.37(5.41,27.73)	12.54(7.56,19.25)	-0.08(-0.33,0.17)	311.01(147.19,819.52)	338.83(203.42,521.84)	-0.09(-0.33,0.16)
Mali	3.86(2.49,5.63)	4.95(2.83,7.72)	0.79(0.76,0.82)	10.04(6.50,14.63)	13.78(7.79,21.60)	1.01(0.98,1.04)	3.08(2.00,4.49)	3.89(2.23,5.97)	0.76(0.73,0.78)	84.93(55.29,123.72)	105.49(59.68,162.43)	0.69(0.66,0.72)
Malta	42.06(33.03,52.29)	33.84(25.89,43.46)	-1.02(-1.24,-0.81)	147.08(115.04,184.56)	132.85(101.99,171.32)	-0.63(-0.87,-0.39)	31.07(24.59,38.29)	23.98(18.31,30.61)	-1.15(-1.36,-0.93)	775.49(617.16,955.92)	585.24(452.16,742.08)	-1.22(-1.43,-1.02)
Marshall Islands	8.91(5.27,14.67)	16.25(8.00,28.95)	1.93(1.80,2.06)	25.30(14.97,42.03)	50.62(24.61,91.20)	2.18(2.05,2.31)	5.88(3.48,9.63)	10.15(5.11,17.77)	1.78(1.65,1.90)	153.89(92.36,253.91)	266.87(133.01,471.58)	1.79(1.67,1.92)
Mauritania	6.41(3.99,9.88)	10.09(5.34,16.76)	1.32(1.24,1.39)	16.94(10.53,26.21)	30.40(16.06,50.39)	1.74(1.67,1.82)	5.13(3.21,7.86)	7.72(3.99,12.91)	1.19(1.12,1.26)	139.69(87.29,214.96)	207.71(107.42,347.92)	1.15(1.08,1.22)
Mauritius	19.54(16.06,23.52)	33.21(26.73,40.24)	1.41(1.02,1.81)	69.89(56.92,84.77)	135.85(108.70,166.26)	1.81(1.40,2.22)	11.29(9.42,13.35)	17.57(14.44,20.91)	1.19(0.79,1.59)	319.07(266.24,379.80)	498.72(410.52,593.11)	1.19(0.78,1.61)
Mexico	16.76(15.81,17.69)	24.16(20.08,28.43)	1.15(1.08,1.21)	47.02(44.41,49.54)	82.44(68.00,97.78)	1.76(1.68,1.84)	13.49(12.69,14.26)	17.43(14.60,20.40)	0.84(0.79,0.90)	336.29(318.61,353.90)	478.52(397.36,564.41)	1.11(1.05,1.17)
Micronesia (Federated States of)	9.59(5.37,16.49)	16.51(8.23,28.43)	1.77(1.67,1.88)	27.24(15.09,47.55)	53.27(26.03,93.21)	2.17(2.03,2.30)	6.25(3.54,10.60)	10.04(5.13,17.17)	1.57(1.48,1.66)	167.42(94.39,286.46)	267.62(133.85,462.22)	1.55(1.47,1.64)
Monaco	32.96(18.41,56.22)	28.15(16.07,49.25)	-0.66(-0.72,-0.60)	128.91(71.98,219.22)	111.09(63.57,193.76)	-0.64(-0.70,-0.58)	22.78(12.76,39.10)	19.93(11.27,35.00)	-0.56(-0.61,-0.51)	596.09(335.77,1017.03)	483.04(275.41,838.80)	-0.83(-0.89,-0.77)
Mongolia	14.23(9.13,21.87)	18.14(12.15,25.45)	0.79(0.65,0.92)	40.49(26.13,61.91)	55.89(37.54,78.29)	1.11(0.96,1.26)	11.26(7.17,17.20)	14.31(9.50,20.23)	0.76(0.63,0.88)	330.77(212.34,502.49)	394.49(265.00,553.55)	0.56(0.42,0.70)
Montenegro	22.72(15.63,32.06)	24.10(16.11,34.57)	0.40(0.13,0.68)	83.66(56.95,118.58)	85.21(56.58,123.85)	0.40(0.10,0.70)	16.71(11.56,23.30)	18.66(12.57,26.43)	0.48(0.24,0.72)	463.93(321.06,648.23)	469.00(314.30,667.63)	0.26(-0.04,0.56)
Morocco	8.67(5.02,13.56)	13.49(7.72,21.45)	1.55(1.49,1.61)	24.74(14.39,38.81)	43.71(24.93,69.99)	1.94(1.88,2.01)	6.77(3.91,10.58)	10.00(5.63,16.03)	1.40(1.34,1.47)	183.37(106.58,286.16)	270.93(152.16,437.77)	1.40(1.33,1.46)
Mozambique	15.60(8.74,24.49)	21.66(11.97,35.33)	1.14(1.02,1.25)	40.18(22.30,63.64)	58.13(31.57,95.67)	1.23(1.10,1.36)	12.74(7.15,19.76)	17.42(9.72,28.53)	1.12(1.00,1.23)	340.01(189.05,531.27)	461.73(254.88,762.73)	1.08(0.97,1.19)
Myanmar	16.96(9.81,29.25)	23.88(14.40,38.26)	0.97(0.90,1.05)	50.22(28.69,87.27)	85.16(50.97,136.31)	1.60(1.53,1.67)	10.73(6.26,18.56)	13.80(8.43,21.83)	0.70(0.64,0.76)	308.80(178.14,538.54)	389.40(238.46,615.28)	0.62(0.55,0.69)
Namibia	11.31(7.16,17.06)	15.68(8.86,25.29)	0.81(0.66,0.96)	30.20(18.98,45.86)	45.51(25.33,74.52)	1.11(1.01,1.21)	9.11(5.78,13.73)	12.29(7.00,19.70)	0.73(0.58,0.88)	240.06(152.95,364.68)	320.68(177.75,521.21)	0.70(0.54,0.85)
Nauru	10.58(5.91,19.28)	16.08(7.91,29.49)	1.42(1.39,1.44)	31.21(17.17,58.24)	52.74(25.30,98.64)	1.71(1.67,1.76)	6.76(3.87,12.00)	9.68(4.81,17.35)	1.27(1.23,1.30)	181.24(102.28,325.47)	260.26(126.89,473.33)	1.27(1.23,1.31)
Nepal	10.38(4.90,17.92)	15.61(8.92,26.98)	1.26(1.20,1.33)	27.27(13.00,47.36)	46.57(26.37,80.52)	1.69(1.63,1.75)	8.34(3.93,14.20)	12.10(6.98,20.97)	1.17(1.10,1.23)	225.87(109.22,383.94)	319.18(183.33,554.57)	1.07(1.00,1.14)
Netherlands	42.63(35.61,49.18)	26.88(21.32,33.10)	-1.71(-1.85,-1.57)	149.58(124.68,173.37)	92.87(73.94,114.94)	-1.80(-2.00,-1.60)	32.26(27.14,36.90)	21.39(16.87,26.42)	-1.50(-1.60,-1.39)	817.56(692.35,931.94)	482.77(387.14,591.24)	-1.87(-1.97,-1.76)
New Zealand	41.47(34.22,49.36)	21.15(16.46,26.34)	-2.21(-2.41,-2.01)	148.24(121.43,177.98)	78.00(60.53,97.81)	-2.13(-2.35,-1.91)	29.17(24.25,34.43)	15.21(11.89,18.88)	-2.10(-2.31,-1.90)	752.40(630.95,885.79)	358.37(285.43,442.43)	-2.42(-2.61,-2.23)
Nicaragua	5.95(3.87,9.12)	10.99(7.17,15.90)	2.19(1.85,2.53)	17.98(11.69,27.37)	37.61(24.39,54.53)	2.58(2.24,2.93)	4.58(2.97,7.07)	8.01(5.24,11.57)	2.03(1.69,2.37)	124.12(81.56,189.86)	219.16(143.12,314.91)	2.03(1.70,2.37)
Niger	4.31(2.47,7.09)	6.12(3.46,10.05)	1.17(1.12,1.22)	11.20(6.44,18.45)	16.53(9.22,27.28)	1.31(1.25,1.36)	3.49(2.01,5.72)	4.92(2.76,8.10)	1.17(1.12,1.21)	95.40(55.54,155.59)	131.02(72.72,216.56)	1.05(1.00,1.10)
Nigeria	7.61(4.44,10.89)	12.56(7.13,18.29)	1.75(1.60,1.89)	19.03(11.07,27.64)	33.35(19.01,49.44)	1.97(1.79,2.15)	6.29(3.66,8.92)	10.13(5.80,14.52)	1.67(1.54,1.80)	161.42(94.00,231.90)	257.97(148.45,374.33)	1.66(1.51,1.80)
Niue	11.02(6.60,17.32)	17.16(8.96,28.54)	1.34(1.25,1.43)	34.38(20.53,54.48)	60.24(31.21,101.07)	1.71(1.60,1.82)	6.99(4.21,10.89)	10.20(5.35,16.89)	1.17(1.11,1.24)	179.22(107.41,281.85)	259.71(135.22,430.71)	1.14(1.08,1.21)
North Macedonia	25.15(18.37,33.68)	30.56(20.52,42.84)	0.60(0.36,0.84)	80.03(58.27,107.52)	102.01(67.55,144.98)	0.81(0.54,1.09)	19.57(14.37,26.14)	24.02(16.49,33.48)	0.63(0.40,0.86)	538.02(395.15,717.92)	610.62(416.39,856.51)	0.37(0.16,0.59)
Northern Mariana Islands	11.46(6.47,21.04)	21.77(14.29,31.63)	2.64(2.22,3.05)	38.71(21.60,71.41)	81.24(52.73,118.80)	2.90(2.47,3.33)	6.85(3.96,12.50)	12.52(8.32,17.99)	2.56(2.14,2.98)	178.30(102.87,326.51)	320.91(212.76,461.50)	2.53(2.13,2.93)
Norway	45.53(40.68,50.20)	30.91(26.62,34.95)	-1.27(-1.52,-1.03)	170.46(149.95,191.57)	117.57(101.00,135.15)	-1.13(-1.46,-0.80)	32.03(29.07,34.62)	22.54(19.62,25.02)	-1.21(-1.40,-1.01)	829.48(760.77,894.54)	507.29(450.88,558.95)	-1.59(-1.83,-1.36)
Oman	6.40(2.59,11.09)	7.96(4.68,12.28)	0.63(0.26,1.00)	19.33(7.94,33.62)	28.10(16.30,43.31)	1.09(0.72,1.46)	4.85(1.97,8.49)	5.71(3.38,8.82)	0.49(0.13,0.85)	131.31(53.81,229.40)	151.81(88.68,233.59)	0.41(0.04,0.77)
Pakistan	18.94(12.29,26.48)	29.79(17.73,46.40)	1.29(1.14,1.45)	48.64(31.60,67.64)	80.04(47.51,124.74)	1.43(1.30,1.56)	15.22(9.79,21.44)	23.53(14.11,36.10)	1.26(1.09,1.42)	407.36(265.07,568.31)	618.93(370.52,949.95)	1.18(1.02,1.34)
Palau	2.99(1.71,4.88)	3.76(2.23,5.90)	0.72(0.64,0.80)	9.01(5.08,15.00)	12.30(7.16,19.52)	0.89(0.77,1.01)	1.94(1.13,3.13)	2.39(1.45,3.66)	0.73(0.68,0.78)	47.55(27.50,77.90)	55.79(33.43,86.75)	0.53(0.47,0.58)
Palestine	10.66(6.13,17.88)	15.76(10.03,22.96)	1.43(1.35,1.51)	31.62(18.03,53.65)	51.74(32.93,75.29)	1.70(1.60,1.80)	8.27(4.81,13.77)	11.88(7.73,17.30)	1.37(1.28,1.46)	216.77(125.98,362.47)	302.76(197.34,437.95)	1.25(1.17,1.34)
Panama	7.78(6.32,9.43)	16.44(12.37,21.00)	2.55(2.11,2.98)	24.23(19.50,29.55)	58.66(43.75,75.32)	3.03(2.63,3.44)	5.96(4.86,7.17)	11.82(8.91,15.06)	2.33(1.87,2.80)	156.05(127.76,187.74)	317.87(240.11,405.33)	2.47(2.05,2.88)
Papua New Guinea	6.56(3.29,11.41)	9.46(4.64,16.24)	1.10(0.99,1.21)	19.08(9.45,33.47)	30.03(14.74,51.67)	1.33(1.20,1.45)	4.20(2.13,7.23)	5.84(2.88,9.95)	1.05(0.97,1.13)	114.69(57.58,197.97)	158.17(77.25,270.09)	1.01(0.92,1.09)
Paraguay	8.69(5.66,13.37)	14.72(9.25,22.33)	1.62(1.34,1.90)	25.70(16.71,39.72)	47.10(29.38,71.96)	1.81(1.52,2.10)	6.82(4.48,10.47)	11.18(7.02,17.08)	1.55(1.28,1.81)	176.48(116.31,272.48)	288.24(180.45,441.51)	1.50(1.22,1.79)
Peru	13.43(9.04,19.31)	18.77(12.05,27.83)	0.94(0.78,1.09)	38.47(25.84,55.52)	65.00(41.10,97.27)	1.64(1.48,1.80)	10.59(7.08,15.15)	13.63(8.76,20.19)	0.66(0.51,0.81)	279.55(187.35,400.61)	362.87(232.78,538.05)	0.69(0.55,0.84)
Philippines	19.59(13.18,25.35)	29.18(21.41,38.49)	1.38(1.35,1.41)	59.62(40.72,76.88)	101.27(73.14,134.68)	1.71(1.66,1.75)	12.18(8.12,15.89)	16.42(12.34,21.44)	1.15(1.10,1.21)	327.36(223.08,422.38)	468.62(346.74,611.38)	1.28(1.25,1.32)
Poland	37.37(34.58,40.22)	37.75(32.68,42.62)	0.05(-0.16,0.26)	120.07(109.57,130.84)	123.89(106.42,141.51)	0.16(-0.11,0.43)	28.94(27.14,30.67)	30.33(26.45,33.98)	0.16(-0.02,0.34)	817.61(771.31,864.47)	763.79(670.30,855.42)	-0.19(-0.39,0.01)
Portugal	19.17(15.67,22.96)	14.88(11.63,18.63)	-0.96(-1.16,-0.76)	57.88(47.19,69.59)	48.68(38.10,61.02)	-0.66(-0.89,-0.42)	15.95(13.12,19.10)	12.45(9.71,15.50)	-0.96(-1.15,-0.77)	407.29(336.60,485.06)	306.64(242.85,379.76)	-1.04(-1.24,-0.83)
Puerto Rico	10.93(8.48,13.82)	18.39(13.65,24.09)	1.69(1.08,2.30)	33.97(26.43,43.08)	69.19(51.24,91.23)	2.32(1.65,3.00)	8.54(6.64,10.81)	13.07(9.76,16.93)	1.40(0.82,1.98)	208.04(161.63,261.95)	337.58(253.12,437.66)	1.55(0.96,2.16)
Qatar	24.92(15.39,39.10)	28.59(16.77,44.23)	0.85(0.59,1.11)	73.47(44.90,115.85)	97.47(56.07,152.42)	1.29(1.09,1.50)	19.44(12.04,30.25)	21.50(12.75,32.75)	0.71(0.42,1.01)	485.42(300.37,758.35)	515.72(302.48,786.43)	0.59(0.34,0.85)
Republic of Korea	8.92(6.71,13.44)	14.51(9.15,19.66)	1.36(1.09,1.63)	28.96(21.91,42.91)	65.57(41.68,88.10)	2.58(2.21,2.96)	6.61(4.94,10.13)	9.06(5.62,12.26)	0.71(0.45,0.97)	184.56(140.71,276.58)	240.59(154.74,320.69)	0.64(0.46,0.82)
Republic of Moldova	24.39(20.44,28.72)	17.36(13.94,21.16)	-0.84(-1.25,-0.43)	75.22(63.02,89.14)	57.61(46.04,70.44)	-0.58(-1.01,-0.14)	19.29(16.20,22.61)	13.53(10.95,16.30)	-0.87(-1.28,-0.47)	570.06(479.95,666.57)	386.03(312.16,466.58)	-1.00(-1.39,-0.60)
Romania	23.43(19.34,27.86)	30.61(23.50,38.60)	0.84(0.71,0.97)	79.04(64.73,94.39)	109.29(83.64,139.16)	1.06(0.91,1.22)	17.47(14.48,20.57)	23.12(17.96,28.94)	0.90(0.78,1.02)	515.09(427.56,604.58)	622.25(481.98,780.62)	0.60(0.49,0.71)
Russian Federation	31.96(30.38,33.34)	30.31(26.75,33.91)	-0.22(-0.39,-0.06)	111.02(105.64,115.72)	109.33(96.58,122.72)	-0.10(-0.24,0.05)	21.95(20.88,22.91)	20.69(18.25,23.12)	-0.24(-0.42,-0.07)	637.57(607.94,664.59)	564.00(497.87,632.97)	-0.50(-0.65,-0.34)
Rwanda	20.15(10.50,34.89)	26.68(15.09,42.53)	0.86(0.77,0.95)	49.87(25.73,88.04)	74.79(41.72,119.70)	1.52(1.30,1.73)	16.50(8.52,28.64)	21.16(12.08,34.02)	0.77(0.69,0.84)	445.71(230.46,785.36)	557.95(314.83,896.99)	0.66(0.57,0.74)
Saint Kitts and Nevis	26.12(18.98,34.78)	27.46(20.99,35.05)	0.44(0.24,0.63)	71.49(51.57,95.85)	82.65(62.04,107.42)	0.64(0.44,0.85)	20.84(15.25,27.56)	21.81(16.88,27.49)	0.50(0.30,0.69)	539.63(393.19,716.74)	527.60(402.30,674.24)	0.19(0.02,0.36)
Saint Lucia	25.54(19.27,33.36)	28.09(21.26,36.11)	-0.04(-0.22,0.15)	75.40(56.61,98.76)	92.41(69.31,119.54)	0.44(0.30,0.59)	19.83(15.07,25.81)	21.09(16.14,26.88)	-0.25(-0.47,-0.03)	522.46(394.31,680.76)	548.25(418.28,701.58)	-0.13(-0.32,0.06)
Saint Vincent and the Grenadines	22.95(18.15,28.98)	25.77(20.13,32.62)	0.32(0.12,0.53)	67.82(53.36,85.80)	84.44(65.47,107.49)	0.60(0.38,0.81)	17.83(14.15,22.64)	19.03(15.05,23.82)	0.20(-0.01,0.40)	466.90(371.28,589.53)	515.44(407.31,644.51)	0.26(0.05,0.48)
Samoa	14.37(8.76,22.08)	20.21(11.41,32.69)	1.03(0.95,1.11)	44.32(26.77,68.82)	70.81(39.62,115.29)	1.43(1.34,1.53)	9.11(5.67,13.82)	11.95(6.72,19.26)	0.85(0.79,0.90)	240.41(148.61,366.96)	317.63(177.65,513.24)	0.88(0.83,0.93)
San Marino	21.68(13.80,32.82)	12.03(6.52,19.87)	-1.15(-1.42,-0.88)	78.70(50.09,119.38)	48.50(26.05,81.00)	-0.76(-1.06,-0.45)	16.09(10.18,24.30)	8.46(4.66,13.71)	-1.36(-1.61,-1.10)	378.66(240.80,569.06)	206.25(113.07,337.67)	-1.18(-1.45,-0.91)
Sao Tome and Principe	11.14(7.05,16.60)	18.03(9.79,30.64)	1.49(1.40,1.57)	31.70(19.96,47.53)	57.07(30.64,97.17)	1.84(1.77,1.91)	8.66(5.50,12.89)	13.46(7.31,22.88)	1.37(1.30,1.45)	241.74(152.13,362.45)	375.43(203.23,641.41)	1.36(1.27,1.44)
Saudi Arabia	9.52(5.62,15.77)	14.20(8.33,23.22)	1.18(0.96,1.39)	28.20(16.63,46.72)	49.22(28.91,80.46)	1.67(1.48,1.86)	7.42(4.32,12.42)	10.22(6.01,16.86)	0.90(0.68,1.12)	196.95(115.37,331.65)	270.38(158.50,443.68)	0.91(0.70,1.12)
Senegal	5.78(3.55,8.64)	10.01(5.21,16.32)	1.90(1.79,2.01)	15.68(9.58,23.49)	29.07(15.14,47.39)	2.10(1.98,2.22)	4.62(2.86,6.93)	7.85(4.10,12.85)	1.86(1.75,1.97)	125.48(77.68,188.47)	209.94(109.54,343.15)	1.81(1.69,1.93)
Serbia	26.14(18.01,36.84)	31.20(20.82,43.61)	0.57(0.49,0.65)	78.24(53.54,110.63)	103.90(68.84,145.62)	0.99(0.87,1.10)	21.51(14.92,30.24)	24.75(16.44,34.45)	0.44(0.38,0.50)	566.48(395.63,792.00)	650.95(435.17,903.19)	0.44(0.35,0.52)
Seychelles	27.25(17.54,41.20)	39.89(26.53,57.68)	1.58(1.29,1.86)	95.78(61.75,142.38)	153.00(101.70,221.89)	1.88(1.57,2.19)	15.88(10.25,24.06)	22.40(14.99,31.99)	1.41(1.14,1.68)	455.67(295.87,681.01)	603.99(404.76,863.37)	1.28(1.04,1.53)
Sierra Leone	5.01(2.84,7.79)	8.17(4.69,13.03)	1.72(1.67,1.78)	13.27(7.42,20.71)	22.92(13.07,36.68)	1.90(1.81,1.99)	4.03(2.30,6.28)	6.44(3.66,10.38)	1.67(1.61,1.73)	109.12(61.44,170.70)	173.29(98.38,280.52)	1.66(1.59,1.73)
Singapore	22.31(18.06,27.06)	18.45(14.37,23.09)	-0.56(-0.81,-0.32)	76.73(61.76,93.58)	84.39(65.61,105.91)	0.37(0.03,0.71)	16.28(13.28,19.62)	11.41(8.97,14.14)	-1.10(-1.30,-0.90)	446.05(364.52,534.78)	312.35(247.58,384.33)	-1.12(-1.32,-0.92)
Slovakia	33.24(24.26,43.42)	30.83(19.40,44.68)	-0.23(-0.36,-0.11)	110.26(79.93,145.34)	110.62(70.32,161.11)	0.03(-0.10,0.17)	25.72(18.89,33.55)	23.45(14.71,33.90)	-0.30(-0.42,-0.19)	712.10(520.22,926.94)	613.56(388.60,879.79)	-0.47(-0.58,-0.37)
Slovenia	30.49(24.82,36.35)	22.42(16.95,28.73)	-0.74(-1.00,-0.48)	94.46(76.03,113.22)	71.71(53.90,92.37)	-0.57(-0.91,-0.23)	24.65(20.16,29.14)	18.65(14.24,23.70)	-0.69(-0.91,-0.46)	656.91(537.83,775.91)	453.56(346.90,575.39)	-0.96(-1.21,-0.70)
Solomon Islands	5.89(1.97,10.89)	11.63(6.06,19.63)	2.32(2.21,2.43)	16.73(5.55,31.41)	37.66(19.35,64.17)	2.73(2.60,2.85)	3.90(1.29,7.14)	7.17(3.77,12.02)	2.11(2.01,2.21)	103.71(34.10,192.62)	194.47(100.75,328.30)	2.20(2.07,2.32)
Somalia	13.56(7.11,24.76)	16.08(9.12,27.07)	0.60(0.57,0.62)	33.58(17.40,62.17)	41.36(23.20,70.36)	0.72(0.69,0.74)	11.08(5.90,20.30)	13.11(7.46,22.13)	0.61(0.58,0.63)	300.43(158.14,559.83)	352.20(198.08,601.16)	0.56(0.54,0.59)
South Africa	13.44(9.11,18.26)	22.02(16.22,26.65)	1.81(1.67,1.95)	37.42(25.87,51.50)	63.23(46.92,76.80)	1.93(1.71,2.15)	10.79(7.20,14.56)	17.34(12.68,20.90)	1.72(1.60,1.85)	274.13(187.64,373.84)	438.41(325.04,529.18)	1.75(1.60,1.91)
South Sudan	15.63(8.91,26.21)	18.78(10.84,30.94)	0.56(0.44,0.68)	40.64(22.94,68.86)	51.15(29.31,84.25)	0.70(0.55,0.84)	12.65(7.29,20.82)	14.93(8.61,24.22)	0.51(0.40,0.63)	338.91(194.29,563.32)	398.47(228.78,648.64)	0.49(0.37,0.62)
Spain	30.75(25.19,36.38)	25.64(19.83,32.18)	-0.70(-0.83,-0.58)	139.33(113.43,165.96)	119.05(92.10,150.06)	-0.61(-0.74,-0.47)	17.97(14.94,20.97)	15.36(11.92,19.10)	-0.62(-0.76,-0.48)	479.05(399.41,556.98)	387.82(304.78,479.50)	-0.79(-0.92,-0.67)
Sri Lanka	12.37(8.16,17.96)	19.00(10.42,30.26)	1.81(1.59,2.03)	41.78(27.43,60.65)	77.23(41.30,123.68)	2.42(2.19,2.65)	7.45(4.94,10.66)	10.26(5.67,16.26)	1.46(1.24,1.67)	204.32(135.78,292.06)	277.32(150.43,443.81)	1.42(1.20,1.63)
Sudan	5.57(1.33,12.11)	8.14(4.16,14.56)	1.30(1.15,1.45)	15.29(3.89,33.35)	25.10(12.81,44.97)	1.67(1.48,1.85)	4.40(0.99,9.72)	6.17(3.18,10.85)	1.18(1.04,1.33)	119.55(29.33,262.78)	164.98(85.73,292.90)	1.12(0.97,1.27)
Suriname	22.01(14.42,32.15)	23.43(14.75,35.31)	0.48(0.32,0.64)	62.72(40.88,91.16)	72.02(45.35,108.49)	0.68(0.51,0.84)	17.34(11.34,25.64)	17.98(11.39,27.19)	0.44(0.29,0.60)	458.24(301.09,672.46)	473.93(301.33,716.60)	0.37(0.21,0.52)
Sweden	47.25(40.37,54.71)	24.63(19.40,30.44)	-2.20(-2.46,-1.94)	181.61(155.21,211.69)	87.98(69.31,109.19)	-2.39(-2.69,-2.10)	32.90(28.23,37.89)	19.32(15.23,23.70)	-1.83(-2.09,-1.58)	858.39(740.49,983.56)	436.08(348.44,534.85)	-2.25(-2.52,-1.98)
Switzerland	26.18(20.50,31.78)	21.57(16.31,27.35)	-0.96(-1.46,-0.46)	104.99(82.17,128.16)	82.38(62.83,104.66)	-1.10(-1.63,-0.57)	17.42(13.71,20.97)	15.60(11.76,19.74)	-0.66(-1.14,-0.17)	441.89(352.17,528.00)	347.69(267.18,436.54)	-1.10(-1.59,-0.61)
Syrian Arab Republic	6.38(3.96,9.59)	8.89(5.50,13.66)	0.93(0.81,1.06)	19.22(11.98,29.24)	30.25(18.38,46.93)	1.27(1.12,1.42)	4.89(3.00,7.25)	6.57(4.09,9.82)	0.85(0.72,0.97)	131.51(81.37,195.59)	169.42(104.08,256.42)	0.68(0.56,0.80)
Taiwan (Province of China)	15.07(12.21,17.97)	24.04(18.22,30.52)	1.25(0.97,1.52)	59.56(47.90,71.67)	119.15(90.01,151.80)	2.00(1.70,2.31)	7.91(6.48,9.32)	10.30(7.98,12.82)	0.60(0.34,0.85)	219.39(179.80,257.58)	298.23(233.15,369.62)	0.78(0.55,1.01)
Tajikistan	6.57(3.82,10.31)	6.76(4.26,9.93)	-0.09(-0.22,0.05)	19.25(11.52,30.41)	20.80(12.88,30.82)	0.15(0.07,0.23)	5.33(3.00,8.33)	5.30(3.40,7.74)	-0.19(-0.37,-0.02)	145.27(85.93,227.90)	150.72(96.10,221.14)	-0.02(-0.15,0.11)
Thailand	17.75(11.58,25.89)	24.74(14.61,36.90)	0.87(0.74,1.00)	60.76(39.77,89.03)	104.47(61.09,157.16)	1.56(1.39,1.73)	10.51(6.87,15.24)	12.89(7.76,18.86)	0.46(0.35,0.56)	289.78(191.70,419.36)	358.09(213.82,526.32)	0.49(0.38,0.59)
Timor-Leste	10.97(5.55,20.44)	19.84(11.55,32.31)	2.10(1.95,2.24)	32.34(16.40,60.59)	67.84(39.13,111.29)	2.63(2.46,2.80)	7.02(3.55,12.88)	11.68(6.93,18.42)	1.83(1.68,1.98)	198.35(100.93,365.51)	328.85(192.95,524.83)	1.81(1.65,1.97)
Togo	5.99(3.66,9.07)	9.43(5.07,15.52)	1.39(1.34,1.44)	16.27(9.90,24.73)	27.11(14.53,45.01)	1.54(1.44,1.63)	4.76(2.90,7.14)	7.38(3.95,12.29)	1.37(1.33,1.41)	130.38(79.31,196.35)	198.75(106.79,330.62)	1.30(1.26,1.35)
Tokelau	10.19(6.05,16.46)	15.62(8.25,25.97)	1.38(1.27,1.50)	30.11(17.57,49.30)	54.91(28.48,91.94)	1.90(1.78,2.02)	6.58(3.94,10.63)	9.17(4.93,15.15)	1.12(1.02,1.21)	171.74(102.09,279.47)	239.93(127.88,398.07)	1.13(1.03,1.22)
Tonga	7.81(3.35,12.44)	11.77(5.66,19.80)	1.32(1.20,1.44)	24.42(10.87,38.74)	40.67(19.68,68.65)	1.56(1.42,1.71)	4.92(2.00,7.70)	7.06(3.37,11.86)	1.24(1.14,1.33)	128.21(54.98,199.65)	181.13(87.28,303.71)	1.15(1.05,1.24)
Trinidad and Tobago	29.28(23.06,37.27)	29.38(21.25,39.46)	-0.07(-0.21,0.07)	87.16(68.47,111.20)	99.38(71.07,134.00)	0.39(0.25,0.52)	22.50(17.83,28.53)	21.29(15.62,28.08)	-0.27(-0.42,-0.12)	603.28(480.44,761.78)	583.73(422.47,776.43)	-0.21(-0.34,-0.07)
Tunisia	11.15(6.94,16.90)	15.00(8.77,23.82)	0.86(0.81,0.92)	34.16(21.32,51.92)	52.73(30.56,84.57)	1.28(1.20,1.35)	8.62(5.31,13.10)	10.96(6.51,17.59)	0.69(0.64,0.75)	222.63(139.12,335.79)	283.58(167.36,455.53)	0.70(0.64,0.75)
Turkey	19.66(12.28,31.25)	21.10(13.75,29.86)	0.18(0.04,0.34)	58.80(36.15,94.74)	74.99(48.30,106.63)	0.73(0.62,0.84)	15.17(9.58,23.84)	15.49(10.11,21.74)	0.06(-0.12,0.23)	406.59(255.46,647.81)	396.03(256.69,554.44)	-0.17(-0.31,-0.02)
Turkmenistan	8.87(7.41,10.51)	16.27(11.94,21.93)	3.54(1.30,5.83)	27.74(23.07,33.11)	54.28(39.45,73.68)	3.89(1.64,6.18)	6.80(5.73,7.97)	12.17(9.02,16.35)	3.39(1.14,5.68)	202.91(171.15,237.60)	359.39(265.15,487.18)	3.50(1.25,5.79)
Tuvalu	8.02(4.45,13.97)	14.51(7.88,23.99)	1.90(1.73,2.07)	22.85(12.74,40.40)	48.39(26.10,80.76)	2.37(2.17,2.58)	5.27(2.89,9.24)	8.83(4.77,14.53)	1.70(1.56,1.84)	140.26(78.20,248.74)	232.71(124.96,385.16)	1.66(1.52,1.79)
Uganda	18.51(11.19,28.33)	29.06(16.36,46.22)	1.02(0.81,1.24)	46.63(28.26,71.87)	79.79(44.30,127.38)	1.32(1.12,1.51)	15.24(9.27,22.90)	23.35(13.10,36.43)	0.98(0.77,1.18)	393.43(239.66,591.89)	601.96(332.03,945.44)	0.93(0.71,1.15)
Ukraine	22.84(17.01,30.16)	25.45(15.56,38.76)	0.34(0.09,0.60)	85.26(62.85,113.58)	99.72(59.85,153.71)	0.55(0.28,0.82)	15.98(12.02,20.83)	17.56(10.82,26.45)	0.28(0.04,0.53)	470.83(352.86,617.73)	514.73(310.21,785.93)	0.26(0.00,0.52)
United Arab Emirates	39.08(20.81,76.71)	83.32(54.38,123.82)	3.67(3.17,4.18)	112.86(59.18,224.81)	202.15(130.92,304.26)	2.68(2.29,3.06)	30.64(16.58,58.95)	74.94(49.00,110.17)	4.37(3.78,4.97)	796.88(424.91,1565.97)	1470.21(960.48,2179.98)	3.08(2.63,3.53)
United Kingdom	52.26(49.68,54.33)	33.72(30.80,35.73)	-1.49(-1.66,-1.32)	189.71(180.86,197.75)	132.30(122.96,139.81)	-1.24(-1.47,-1.02)	37.17(35.31,38.53)	23.69(21.41,25.13)	-1.52(-1.67,-1.37)	976.33(937.23,1008.58)	544.72(504.86,573.35)	-2.01(-2.16,-1.85)
United Republic of Tanzania	18.07(10.70,27.89)	23.91(14.14,37.80)	0.93(0.84,1.02)	47.91(28.16,74.44)	68.08(39.87,108.30)	1.19(1.06,1.31)	14.56(8.66,22.03)	18.83(11.24,29.30)	0.87(0.79,0.95)	388.57(229.54,590.11)	500.32(295.51,781.96)	0.86(0.77,0.95)
United States of America	41.33(38.46,43.34)	27.60(25.00,29.35)	-1.42(-1.61,-1.22)	158.30(149.32,165.33)	105.07(97.01,111.17)	-1.43(-1.64,-1.23)	27.87(25.71,29.27)	18.95(16.96,20.22)	-1.33(-1.52,-1.14)	709.86(668.42,741.80)	451.93(416.05,477.93)	-1.54(-1.71,-1.37)
United States Virgin Islands	24.64(16.02,36.97)	22.18(13.38,34.72)	0.28(-0.14,0.69)	75.18(48.41,113.53)	73.80(44.01,116.67)	0.71(0.28,1.15)	19.05(12.43,28.51)	16.64(10.17,26.32)	0.08(-0.32,0.48)	487.54(316.77,732.78)	427.92(261.16,674.83)	0.22(-0.18,0.61)
Uruguay	27.90(21.61,35.41)	28.51(22.27,35.83)	0.01(-0.11,0.13)	87.93(67.13,112.06)	99.42(77.29,125.52)	0.37(0.22,0.52)	21.30(16.61,27.05)	20.90(16.38,25.93)	-0.12(-0.23,-0.01)	549.22(427.87,697.13)	534.59(420.90,660.47)	-0.13(-0.24,-0.02)
Uzbekistan	7.05(5.09,9.56)	11.20(8.50,14.33)	1.19(0.87,1.51)	22.17(16.16,29.65)	36.35(27.38,46.80)	1.30(0.94,1.67)	5.48(3.91,7.52)	8.53(6.53,10.87)	1.12(0.82,1.42)	157.17(114.89,209.97)	246.46(188.35,315.47)	1.16(0.84,1.47)
Vanuatu	4.92(1.92,10.18)	8.46(4.07,16.22)	1.69(1.59,1.79)	13.98(5.46,29.35)	26.41(12.66,50.67)	1.93(1.79,2.07)	3.25(1.25,6.75)	5.31(2.56,10.06)	1.56(1.48,1.65)	84.62(32.91,177.45)	140.18(67.45,267.49)	1.60(1.48,1.72)
Venezuela (Bolivarian Republic of)	5.21(4.33,6.20)	19.16(13.62,25.85)	3.58(2.32,4.86)	14.79(12.31,17.66)	65.08(45.52,88.94)	4.16(2.79,5.54)	4.21(3.51,4.99)	14.06(10.09,18.89)	3.31(2.12,4.52)	104.13(87.26,123.19)	377.02(268.00,511.90)	3.50(2.22,4.79)
Viet Nam	8.78(5.38,13.38)	15.67(8.88,25.33)	1.88(1.78,1.97)	28.16(17.18,43.00)	62.08(34.98,101.32)	2.59(2.46,2.72)	5.50(3.37,8.37)	8.67(4.93,14.04)	1.47(1.41,1.54)	146.91(90.92,223.25)	233.46(132.12,380.13)	1.54(1.47,1.61)
Yemen	4.24(0.57,9.64)	7.35(3.22,13.47)	2.02(1.87,2.17)	11.68(1.67,26.58)	21.98(9.90,40.52)	2.29(2.13,2.45)	3.35(0.43,7.76)	5.66(2.43,10.16)	1.93(1.78,2.08)	91.12(12.50,210.84)	150.96(67.60,273.10)	1.86(1.71,2.01)
Zambia	18.12(10.23,28.46)	24.32(13.90,39.69)	0.84(0.68,1.01)	46.43(26.15,73.22)	68.33(38.44,112.71)	1.24(1.01,1.47)	14.70(8.16,23.05)	19.18(11.02,31.31)	0.76(0.61,0.91)	394.71(218.55,621.45)	511.20(289.74,842.66)	0.73(0.58,0.88)
Zimbabwe	17.66(11.49,26.20)	29.75(17.80,46.57)	2.00(1.55,2.46)	46.62(30.30,69.02)	79.20(46.31,126.29)	2.00(1.62,2.38)	14.45(9.41,21.42)	23.93(14.32,37.39)	1.96(1.54,2.39)	363.69(236.90,535.49)	627.43(368.39,990.84)	2.14(1.67,2.62)
