# Supplementary material for: Global, Regional, and National Burden of Ovarian Cancer in Women Aged 45+ from 1990 to 2021 and Projections for 2050: A Systematic Analysis Based on the 2021 Global Burden of Disease Study
Source: Research Square preprint supplement (doi:10.21203/rs.3.rs-6873532/v1), 2025-06-16
Supplement: Supplementary file 4 [file 8803c9a35c43add8cb652895.xlsx]

## Sheet: Sheet1
group	val	Time	low_50	up_50	low_60	up_60	low_70	up_70	low_80	up_80	low_95	up_95
ASIR	18.938	2022	18.818	19.0581	18.7882	19.0879	18.7535	19.1226	18.7097	19.1664	18.5889	19.2872
ASIR	18.9178	2023	18.7618	19.0737	18.7231	19.1124	18.678	19.1575	18.6211	19.2144	18.4642	19.3713
ASIR	18.9093	2024	18.7213	19.0973	18.6747	19.1439	18.6203	19.1983	18.5517	19.2669	18.3626	19.456
ASIR	18.9112	2025	18.692	19.1303	18.6377	19.1846	18.5743	19.248	18.4944	19.328	18.2739	19.5484
ASIR	18.9182	2026	18.6667	19.1697	18.6044	19.232	18.5316	19.3048	18.4399	19.3966	18.1869	19.6495
ASIR	18.9251	2027	18.6382	19.212	18.5672	19.2831	18.4842	19.3661	18.3795	19.4708	18.0909	19.7594
ASIR	18.9424	2028	18.6167	19.2681	18.536	19.3489	18.4418	19.4431	18.3229	19.562	17.9952	19.8896
ASIR	18.9712	2029	18.6024	19.34	18.511	19.4313	18.4043	19.538	18.2697	19.6727	17.8987	20.0437
ASIR	19.0087	2030	18.5915	19.4258	18.4881	19.5292	18.3674	19.6499	18.2152	19.8022	17.7955	20.2218
ASIR	19.0517	2031	18.5796	19.5239	18.4626	19.6408	18.3261	19.7774	18.1537	19.9497	17.6788	20.4247
ASIR	19.095	2032	18.5603	19.6298	18.4278	19.7623	18.2731	19.917	18.0779	20.1122	17.54	20.6501
ASIR	19.1485	2033	18.5433	19.7537	18.3933	19.9036	18.2182	20.0787	17.9974	20.2996	17.3886	20.9083
ASIR	19.2122	2034	18.5285	19.8959	18.3591	20.0653	18.1613	20.2631	17.9118	20.5127	17.224	21.2004
ASIR	19.2848	2035	18.5139	20.0557	18.3229	20.2467	18.0998	20.4698	17.8184	20.7511	17.0429	21.5266
ASIR	19.3634	2036	18.4957	20.231	18.2808	20.446	18.0297	20.697	17.7131	21.0136	16.8403	21.8864
ASIR	19.4444	2037	18.4698	20.419	18.2284	20.6605	17.9464	20.9425	17.5907	21.2982	16.6103	22.2786
ASIR	19.5342	2038	18.4425	20.6259	18.172	20.8964	17.8562	21.2122	17.4577	21.6107	16.3596	22.7088
ASIR	19.6329	2039	18.4139	20.852	18.1118	21.154	17.7592	21.5067	17.3142	21.9516	16.088	23.1779
ASIR	19.738	2040	18.381	21.095	18.0448	21.4313	17.6522	21.8239	17.1569	22.3192	15.7918	23.6843
ASIR	19.8489	2041	18.3426	21.3552	17.9694	21.7284	17.5336	22.1642	16.9838	22.714	15.4686	24.2293
ASIR	19.9627	2042	18.2952	21.6301	17.8821	22.0433	17.3996	22.5257	16.791	23.1343	15.1137	24.8117
ASIR	20.0839	2043	18.2436	21.9243	17.7876	22.3803	17.2551	22.9128	16.5834	23.5845	14.7321	25.4358
ASIR	20.2116	2044	18.1865	22.2367	17.6848	22.7384	17.0989	23.3243	16.3598	24.0634	14.3227	26.1005
ASIR	20.3441	2045	18.1222	22.5659	17.5717	23.1164	16.9289	23.7593	16.1179	24.5702	13.8829	26.8052
ASIR	20.4805	2046	18.0494	22.9117	17.447	23.5141	16.7436	24.2175	15.8563	25.1048	13.4106	27.5504
ASIR	20.6201	2047	17.9666	23.2737	17.3091	23.9312	16.5414	24.6989	15.5729	25.6674	12.9036	28.3367
ASIR	20.7649	2048	17.8761	23.6537	17.1604	24.3695	16.3246	25.2053	15.2702	26.2597	12.3642	29.1656
ASIR	20.915	2049	17.778	24.052	17.0007	24.8293	16.0931	25.7369	14.9481	26.8819	11.7925	30.0375
ASIR	21.0686	2050	17.6703	24.467	16.8283	25.309	15.8451	26.2922	14.6048	27.5325	11.1863	30.951
ASPR	67.2836	2022	66.8	67.7673	66.6801	67.8871	66.5402	68.0271	66.3637	68.2036	65.8771	68.6901
ASPR	67.4349	2023	66.7861	68.0836	66.6253	68.2444	66.4376	68.4321	66.2008	68.6689	65.5481	69.3216
ASPR	67.6326	2024	66.8333	68.4319	66.6352	68.63	66.4039	68.8612	66.1122	69.153	65.3081	69.957
ASPR	67.8635	2025	66.9136	68.8134	66.6782	69.0487	66.4034	69.3236	66.0567	69.6703	65.1011	70.6258
ASPR	68.1119	2026	67.0006	69.2232	66.7253	69.4986	66.4038	69.8201	65.9982	70.2257	64.8803	71.3435
ASPR	68.367	2027	67.0744	69.6597	66.7542	69.9799	66.3802	70.3539	65.9084	70.8257	64.6081	72.126
ASPR	68.6675	2028	67.1715	70.1634	66.8009	70.5341	66.3681	70.9669	65.8221	71.5129	64.3173	73.0177
ASPR	69.012	2029	67.2877	70.7363	66.8604	71.1636	66.3615	71.6624	65.7322	72.2918	63.9976	74.0264
ASPR	69.3862	2030	67.4041	71.3683	66.913	71.8594	66.3396	72.4329	65.6162	73.1563	63.6223	75.1501
ASPR	69.7774	2031	67.5027	72.0522	66.9391	72.6158	66.2809	73.2739	65.4507	74.1042	63.1625	76.3924
ASPR	70.176	2032	67.5684	72.7836	66.9224	73.4297	66.1679	74.1841	65.2162	75.1358	62.5932	77.7589
ASPR	70.6111	2033	67.6309	73.5912	66.8925	74.3296	66.0303	75.1918	64.9426	76.2795	61.9447	79.2774
ASPR	71.0817	2034	67.6887	74.4748	66.848	75.3155	65.8663	76.2972	64.6279	77.5356	61.2147	80.9488
ASPR	71.5787	2035	67.7304	75.427	66.7769	76.3805	65.6636	77.4939	64.259	78.8985	60.3879	82.7696
ASPR	72.0973	2036	67.7481	76.4466	66.6704	77.5243	65.4121	78.7826	63.8247	80.37	59.4496	84.7451
ASPR	72.6346	2037	67.7352	77.5339	66.5212	78.7479	65.1038	80.1654	63.3156	81.9536	58.3871	86.882
ASPR	73.205	2038	67.7074	78.7027	66.3452	80.0649	64.7546	81.6554	62.7481	83.662	57.2178	89.1923
ASPR	73.8037	2039	67.6596	79.9478	66.1372	81.4702	64.3596	83.2478	62.1171	85.4903	55.9365	91.6709
ASPR	74.4183	2040	67.5781	81.2584	65.8833	82.9532	63.9043	84.9322	61.4078	87.4287	54.527	94.3095
ASPR	75.0458	2041	67.4575	82.6341	65.5774	84.5143	63.382	86.7097	60.6123	89.4793	52.979	97.1126
ASPR	75.6851	2042	67.2941	84.0761	65.215	86.1551	62.7873	88.5828	59.7247	91.6454	51.2839	100.086
ASPR	76.3462	2043	67.0985	85.5938	64.8071	87.8852	62.1316	90.5607	58.7563	93.936	49.4538	103.239
ASPR	77.026	2044	66.8677	87.1842	64.3508	89.7012	61.4118	92.6401	57.7042	96.3477	47.4857	106.566
ASPR	77.7191	2045	66.5955	88.8426	63.8394	91.5987	60.6211	94.817	56.5612	98.8769	45.3716	110.066
ASPR	78.4245	2046	66.2793	90.5698	63.27	93.5791	59.7562	97.0929	55.3234	101.526	43.1061	113.743
ASPR	79.1439	2047	65.9188	92.369	62.642	95.6458	58.8157	99.472	53.9888	104.299	40.6852	117.603
ASPR	79.8808	2048	65.5181	94.2434	61.9594	97.8021	57.8041	101.957	52.5619	107.2	38.114	121.648
ASPR	80.6338	2049	65.0757	96.1919	61.2208	100.047	56.7196	104.548	51.0411	110.227	35.3906	125.877
ASPR	81.3987	2050	64.5868	98.2106	60.4212	102.376	55.5572	107.24	49.4211	113.376	32.5094	130.288
ASMR	13.4015	2022	13.3196	13.4833	13.2994	13.5035	13.2757	13.5272	13.2458	13.5571	13.1635	13.6394
ASMR	13.3393	2023	13.2375	13.4412	13.2122	13.4664	13.1828	13.4958	13.1456	13.533	13.0432	13.6355
ASMR	13.2848	2024	13.1654	13.4043	13.1358	13.4339	13.1012	13.4685	13.0576	13.5121	12.9374	13.6322
ASMR	13.2371	2025	13.101	13.3732	13.0673	13.407	13.0279	13.4463	12.9782	13.496	12.8413	13.633
ASMR	13.191	2026	13.0382	13.3438	13.0003	13.3816	12.9561	13.4259	12.9003	13.4816	12.7466	13.6353
ASMR	13.1429	2027	12.9726	13.3133	12.9304	13.3555	12.8811	13.4048	12.8189	13.467	12.6475	13.6383
ASMR	13.1019	2028	12.9129	13.2908	12.8661	13.3376	12.8115	13.3923	12.7425	13.4612	12.5525	13.6513
ASMR	13.0694	2029	12.8604	13.2783	12.8086	13.3301	12.7482	13.3906	12.6719	13.4668	12.4617	13.6771
ASMR	13.0433	2030	12.8122	13.2744	12.7549	13.3316	12.6881	13.3985	12.6037	13.4828	12.3712	13.7153
ASMR	13.0194	2031	12.7633	13.2754	12.6999	13.3388	12.6258	13.4129	12.5324	13.5063	12.2748	13.7639
ASMR	12.9934	2032	12.709	13.2778	12.6385	13.3483	12.5563	13.4306	12.4525	13.5344	12.1664	13.8205
ASMR	12.9748	2033	12.6584	13.2912	12.58	13.3696	12.4884	13.4612	12.3729	13.5767	12.0546	13.895
ASMR	12.9643	2034	12.6119	13.3166	12.5246	13.404	12.4226	13.5059	12.294	13.6345	11.9395	13.989
ASMR	12.9604	2035	12.5676	13.3531	12.4703	13.4504	12.3567	13.564	12.2134	13.7074	11.8183	14.1024
ASMR	12.9593	2036	12.5214	13.3973	12.4129	13.5058	12.2862	13.6325	12.1264	13.7923	11.6858	14.2329
ASMR	12.9582	2037	12.4697	13.4467	12.3487	13.5677	12.2074	13.7091	12.0291	13.8874	11.5377	14.3787
ASMR	12.9638	2038	12.4194	13.5082	12.2845	13.6431	12.127	13.8006	11.9283	13.9993	11.3807	14.5469
ASMR	12.9769	2039	12.3711	13.5827	12.221	13.7328	12.0458	13.9081	11.8247	14.1292	11.2153	14.7386
ASMR	12.9952	2040	12.3222	13.6681	12.1555	13.8348	11.9608	14.0295	11.7152	14.2751	11.0382	14.9521
ASMR	13.0166	2041	12.2703	13.7628	12.0854	13.9477	11.8695	14.1636	11.5972	14.4359	10.8465	15.1866
ASMR	13.0384	2042	12.2124	13.8644	12.0077	14.069	11.7687	14.308	11.4673	14.6095	10.6364	15.4403
ASMR	13.0663	2043	12.1541	13.9784	11.9281	14.2045	11.6642	14.4684	11.3312	14.8013	10.4136	15.7189
ASMR	13.1	2044	12.0952	14.1048	11.8462	14.3538	11.5555	14.6445	11.1887	15.0113	10.1779	16.0221
ASMR	13.1381	2045	12.0339	14.2423	11.7603	14.5158	11.4409	14.8353	11.0379	15.2383	9.92716	16.349
ASMR	13.1788	2046	11.9684	14.3893	11.6685	14.6892	11.3183	15.0394	10.8765	15.4812	9.6588	16.6989
ASMR	13.2211	2047	11.897	14.5451	11.569	14.8731	11.1859	15.2562	10.7027	15.7394	9.37082	17.0713
ASMR	13.2678	2048	11.8231	14.7125	11.4651	15.0704	11.0471	15.4884	10.5198	16.0157	9.06658	17.469
ASMR	13.3194	2049	11.7468	14.892	11.3572	15.2816	10.9022	15.7366	10.3282	16.3105	8.74635	17.8924
ASMR	13.3743	2050	11.6665	15.082	11.2434	15.5051	10.7494	15.9992	10.1261	16.6225	8.40822	18.3403
ASDR	339.999	2022	337.754	342.244	337.197	342.801	336.548	343.45	335.728	344.27	333.469	346.528
ASDR	338.852	2023	336.067	341.637	335.377	342.327	334.571	343.132	333.555	344.149	330.753	346.95
ASDR	338.003	2024	334.714	341.292	333.9	342.107	332.948	343.058	331.748	344.259	328.44	347.567
ASDR	337.36	2025	333.562	341.157	332.621	342.098	331.522	343.197	330.136	344.583	326.316	348.403
ASDR	336.768	2026	332.421	341.115	331.344	342.193	330.086	343.45	328.499	345.037	324.126	349.41
ASDR	336.15	2027	331.18	341.119	329.949	342.35	328.511	343.788	326.698	345.601	321.699	350.6
ASDR	335.791	2028	330.12	341.463	328.714	342.868	327.073	344.509	325.003	346.579	319.298	352.285
ASDR	335.711	2029	329.242	342.181	327.639	343.784	325.767	345.656	323.406	348.017	316.898	354.525
ASDR	335.817	2030	328.435	343.198	326.606	345.027	324.471	347.163	321.776	349.857	314.351	357.283
ASDR	335.993	2031	327.562	344.423	325.473	346.512	323.034	348.951	319.958	352.028	311.477	360.508
ASDR	336.167	2032	326.532	345.802	324.145	348.19	321.358	350.977	317.841	354.494	308.149	364.186
ASDR	336.565	2033	325.57	347.56	322.846	350.284	319.665	353.465	315.652	357.478	304.592	368.538
ASDR	337.197	2034	324.683	349.71	321.582	352.811	317.962	356.431	313.395	360.999	300.807	373.587
ASDR	337.992	2035	323.791	352.193	320.272	355.711	316.164	359.82	310.981	365.003	296.696	379.288
ASDR	338.872	2036	322.803	354.942	318.821	358.923	314.172	363.572	308.307	369.437	292.143	385.602
ASDR	339.786	2037	321.655	357.917	317.163	362.409	311.917	367.655	305.299	374.272	287.061	392.511
ASDR	340.879	2038	320.497	361.26	315.447	366.31	309.551	372.207	302.112	379.646	281.609	400.148
ASDR	342.154	2039	319.333	364.976	313.678	370.63	307.076	377.233	298.746	385.562	275.79	408.519
ASDR	343.553	2040	318.098	369.009	311.79	375.316	304.426	382.681	295.135	391.972	269.528	417.579
ASDR	345.028	2041	316.734	373.322	309.724	380.333	301.538	388.519	291.211	398.846	262.748	427.308
ASDR	346.539	2042	315.194	377.883	307.428	385.65	298.359	394.718	286.919	406.158	255.388	437.689
ASDR	348.177	2043	313.574	382.78	305	391.354	294.989	401.365	282.359	413.995	247.551	448.804
ASDR	349.942	2044	311.873	388.011	302.44	397.443	291.426	408.458	277.531	422.352	239.236	460.647
ASDR	351.796	2045	310.05	393.542	299.707	403.886	287.629	415.964	272.392	431.2	230.399	473.194
ASDR	353.711	2046	308.072	399.351	296.764	410.659	283.559	423.863	266.902	440.521	220.991	486.432
ASDR	355.664	2047	305.909	405.42	293.581	417.748	279.186	432.143	261.026	450.303	210.976	500.353
ASDR	357.703	2048	303.613	411.793	290.211	425.195	274.562	440.845	254.82	460.587	200.409	514.998
ASDR	359.829	2049	301.186	418.471	286.655	433.002	269.689	449.968	248.285	471.372	189.294	530.363
ASDR	362.016	2050	298.601	425.432	282.888	441.145	264.541	459.492	241.395	482.637	177.604	546.429
