# Supplementary material for: Global, Regional, and National Burden of Ovarian Cancer in Women Aged 45+ from 1990 to 2021 and Projections for 2050: A Systematic Analysis Based on the 2021 Global Burden of Disease Study
Source: Research Square preprint supplement (doi:10.21203/rs.3.rs-6873532/v1), 2025-06-16
Supplement: Supplementary file 5 [file 944cfd63c0d2f3ab404307dd.xlsx]

## Sheet: Sheet1
	21 regions	204 countries
ASIR	r=0.7670, p=0.000e+00	r=0.5182, p=0.000e+00
ASPR	r=0.8571, p=0.000e+00	r=0.6626, p=0.000e+00
ASMR	r=0.6719, p=0.000e+00	r=0.4564, p=7.843e-12
ASDR	r=0.6732, p=0.000e+00	r=0.3935, p=7.838e-09
